# Supplementary material
Source: publisher site journal article supplement (https://www.spandidos-publications.com/6730/downloadSupplementary)
Supplement: Supplementary file 1 [file downloadSupplementary]

## Sheet: SuppTable 4_mRNA
Table SIV. mRNAs expression profiles.
Transcript_ID	Gene_id	Symbol	Description	Database_source	A1	A2	A3	B1	B2	B3	G1	G2	G2_vs_G1_log2FoldChange	G2_vs_G1_Pvalue	G2_vs_G1_FDR
ENSOCUT00000007300	ENSOCUG00000007303	---	---	ProteinCodingRNA	3.24021	3.32129	4.06464	2.99215	5.54053	5.61235	3.54205	4.71501	1.17296	0.0398271	0.586607
ENSOCUT00000001181	ENSOCUG00000001183	SH3GL2	SH3 domain containing GRB2 like 2, endophilin A1	ProteinCodingRNA	8.85014	8.87273	9.07795	8.57225	7.61716	7.06117	8.93361	7.7502	-1.18341	0.00569689	0.24958
ENSOCUT00000024759	ENSOCUG00000027938	SAP25	Sin3A associated protein 25	ProteinCodingRNA	4.09201	3.69978	3.32054	3.99159	5.26481	4.93393	3.70411	4.73011	1.026	0.039433	0.58647
ENSOCUT00000033366	ENSOCUG00000009290	PLEKHG7	pleckstrin homology and RhoGEF domain containing G7	ProteinCodingRNA	2.6016	1.58449	3.85655	4.51498	5.47638	5.58196	2.68088	5.19111	2.51023	0.000522574	0.0596286
ENSOCUT00000031839	ENSOCUG00000024317	PURB	purine rich element binding protein B	ProteinCodingRNA	0	1.58449	0	7.90395	1.59655	2.02102	0.528162	3.84051	3.31234	0.00741902	0.287524
ENSOCUT00000000567	ENSOCUG00000000568	HBB2	---	ProteinCodingRNA	13.1468	13.6449	15.0904	12.6546	12.3398	11.7614	13.9607	12.2519	-1.70879	0.000118265	0.0225632
ENSOCUT00000000312	ENSOCUG00000000312	IGDCC4	immunoglobulin superfamily DCC subclass member 4	ProteinCodingRNA	10.5417	10.5577	10.9603	10.2078	8.9272	9.59208	10.6866	9.57568	-1.11087	0.00146072	0.116648
ENSOCUT00000001387	ENSOCUG00000001389	LINGO4	leucine rich repeat and Ig domain containing 4	ProteinCodingRNA	2.78963	4.16925	4.40793	2.99215	7.0833	6.31301	3.78893	5.46282	1.67389	0.0124156	0.35878
ENSOCUT00000009081	ENSOCUG00000009083	SSR1	translocon-associated protein subunit alpha precursor	ProteinCodingRNA	3.10507	10.8812	10.8722	1.99327	4.10379	3.34712	8.28614	3.14806	-5.13808	1.24221e-05	0.00328964
ENSOCUT00000014517	ENSOCUG00000014516	CCDC68	coiled-coil domain containing 68	ProteinCodingRNA	8.18394	7.87581	8.71099	8.5571	9.96715	9.34985	8.25691	9.29137	1.03445	0.00447734	0.214128
ENSOCUT00000016865	ENSOCUG00000016867	SYT16	synaptotagmin 16	ProteinCodingRNA	3.77336	4.95351	5.25117	5.63506	6.01707	6.13609	4.65934	5.92941	1.27006	0.00903373	0.31677
ENSOCUT00000010018	ENSOCUG00000010019	EXOC3L1	exocyst complex component 3 like 1	ProteinCodingRNA	4.57368	4.64317	4.40793	0	0	0	4.54159	0	-4.54159	8.65472e-08	3.93745e-05
ENSOCUT00000016318	ENSOCUG00000016322	IL12B	interleukin 12B	ProteinCodingRNA	2.78963	2.58437	3.14838	1.57899	0	0	2.84079	0.526329	-2.31446	0.0212655	0.453941
ENSOCUT00000006384	ENSOCUG00000006384	CNGA1	cyclic nucleotide gated channel alpha 1	ProteinCodingRNA	0	0	0	1.99327	4.01626	2.02102	0	2.67685	2.67685	0.00345791	0.185641
ENSOCUT00000012368	ENSOCUG00000012378	SCG2	secretogranin II	ProteinCodingRNA	1.42753	1.58449	2.1281	2.57749	3.60086	4.34851	1.71337	3.50895	1.79558	0.0107326	0.338842
ENSOCUT00000005521	ENSOCUG00000005521	GPBAR1	G-protein coupled bile acid receptor 1	ProteinCodingRNA	3.10507	3.45878	3.14838	3.31385	5.22633	5.19712	3.23741	4.5791	1.34169	0.0145637	0.386833
ENSOCUT00000005520	ENSOCUG00000005519	ARMC12	armadillo repeat containing 12	ProteinCodingRNA	3.47757	4.16925	4.74671	2.99215	6.63187	6.78259	4.13118	5.46887	1.3377	0.0232945	0.471837
ENSOCUT00000013412	ENSOCUG00000013416	CCL1	C-C motif chemokine ligand 1	ProteinCodingRNA	1.82162	1.99947	1.69938	1.99327	5.50881	5.67126	1.84015	4.39112	2.55096	0.000607222	0.0656947
ENSOCUT00000013419	ENSOCUG00000013422	KCNJ1	potassium voltage-gated channel subfamily J member 1	ProteinCodingRNA	0	0	0	0	3.60086	3.72627	0	2.44238	2.44238	0.021631	0.456359
ENSOCUT00000010805	ENSOCUG00000010801	PPEF1	protein phosphatase with EF-hand domain 1	ProteinCodingRNA	5.25463	6.75418	6.9483	5.23919	4.77159	5.55092	6.31904	5.18723	-1.1318	0.0134644	0.371188
ENSOCUT00000002350	ENSOCUG00000002349	CFAP45	cilia and flagella associated protein 45	ProteinCodingRNA	6.04569	5.85728	4.8627	4.7987	4.87473	4.02623	5.58856	4.56655	-1.02201	0.0218884	0.456983
ENSOCUT00000013600	ENSOCUG00000013603	ALAS2	5-aminolevulinate synthase 2	ProteinCodingRNA	9.15176	9.80019	11.1298	8.76254	8.29341	7.29457	10.0272	8.11684	-1.9104	0.000166283	0.0293789
ENSOCUT00000023969	ENSOCUG00000001117	CDKL4	cyclin dependent kinase like 4	ProteinCodingRNA	2.78963	0	0	3.69216	3.92308	3.83334	0.929875	3.81619	2.88632	0.0299876	0.525762
ENSOCUT00000033551	ENSOCUG00000016823	COBL	cordon-bleu WH2 repeat protein	ProteinCodingRNA	8.18394	8.90016	9.46275	8.72237	10.7495	10.1675	8.84895	9.87978	1.03084	0.0222666	0.458866
ENSOCUT00000008710	ENSOCUG00000008711	SAMD7	sterile alpha motif domain containing 7	ProteinCodingRNA	1.42753	1.99947	2.72661	0	0	0	2.0512	0	-2.0512	0.0291941	0.525628
ENSOCUT00000011031	ENSOCUG00000011023	NRAP	nebulin related anchoring protein	ProteinCodingRNA	3.85986	4.9062	1.69938	2.57749	0	0	3.48848	0.859163	-2.62931	0.0397074	0.586607
ENSOCUT00000011039	ENSOCUG00000011007	LRP2	LDL receptor related protein 2	ProteinCodingRNA	5.15551	5.42557	5.06997	4.74625	8.903	7.96449	5.21702	7.20458	1.98756	0.000571662	0.0628382
ENSOCUT00000023387	ENSOCUG00000009681	---	---	ProteinCodingRNA	3.94146	4.85729	3.6133	1.57899	2.82223	3.34712	4.13735	2.58278	-1.55457	0.0289392	0.525018
ENSOCUT00000001148	ENSOCUG00000001145	GRIP2	glutamate receptor interacting protein 2	ProteinCodingRNA	4.35286	0	3.85655	0	0	0	2.73647	0	-2.73647	0.00998473	0.329905
ENSOCUT00000011333	ENSOCUG00000011332	PACSIN1	protein kinase C and casein kinase substrate in neurons 1	ProteinCodingRNA	5.82694	5.12859	5.83769	4.84932	3.71645	5.07152	5.59774	4.54576	-1.05198	0.0353265	0.561616
ENSOCUT00000026607	ENSOCUG00000001145	GRIP2	glutamate receptor interacting protein 2	ProteinCodingRNA	2.78963	2.32136	2.95286	3.45128	5.18679	3.48487	2.68795	4.04098	1.35303	0.0268173	0.502981
ENSOCUT00000009441	ENSOCUG00000009443	SLC7A10	solute carrier family 7 member 10	ProteinCodingRNA	6.10002	6.93003	7.26526	5.12057	3.82346	4.34851	6.7651	4.43084	-2.33426	1.37932e-06	0.000470639
ENSOCUT00000025067	ENSOCUG00000021502	LZTS2	leucine zipper tumor suppressor 2	ProteinCodingRNA	2.6016	1.99947	1.08665	7.89795	1.0087	1.01405	1.8959	3.3069	1.411	0.00503944	0.231915
ENSOCUT00000005736	ENSOCUG00000005736	FAM184A	family with sequence similarity 184 member A	ProteinCodingRNA	7.29748	7.71354	8.02568	4.45087	7.02843	6.0048	7.6789	5.82803	-1.85087	0.00894054	0.314746
ENSOCUT00000030871	ENSOCUG00000023247	JPH4	junctophilin 4	ProteinCodingRNA	5.01178	4.16925	4.24647	3.79902	3.18535	2.34434	4.47583	3.10957	-1.36626	0.0234108	0.472585
ENSOCUT00000025823	ENSOCUG00000001786	FAM98B	family with sequence similarity 98 member B	ProteinCodingRNA	0	0	0	0	8.54477	9.1312	0	5.89199	5.89199	0.00594654	0.256714
ENSOCUT00000009190	ENSOCUG00000009195	CLEC4E	C-type lectin domain family 4 member E	ProteinCodingRNA	5.71536	5.58426	6.2321	4.84932	4.92366	4.41896	5.84391	4.73064	-1.11327	0.00145697	0.116648
ENSOCUT00000027805	ENSOCUG00000008806	SPINK6	serine peptidase inhibitor, Kazal type 6	ProteinCodingRNA	5.37701	2.58437	2.45817	1.57899	1.59655	0	3.47318	1.05851	-2.41467	0.00709236	0.280267
ENSOCUT00000008153	ENSOCUG00000008153	---	---	ProteinCodingRNA	0	1.58449	1.08665	2.31475	3.01518	2.83136	0.890379	2.72043	1.83005	0.0405136	0.588773
ENSOCUT00000026043	ENSOCUG00000012159	TMEM132E	transmembrane protein 132E	ProteinCodingRNA	4.35286	4.85729	5.9729	3.69216	0	0	5.06102	1.23072	-3.8303	0.019149	0.435592
ENSOCUT00000026046	ENSOCUG00000010019	EXOC3L1	exocyst complex component 3 like 1	ProteinCodingRNA	0	0	1.69938	4.94551	5.1043	6.53545	0.566458	5.52842	4.96196	3.29533e-07	0.000129931
ENSOCUT00000025651	ENSOCUG00000026263	---	---	ProteinCodingRNA	0	4.9062	4.06464	0	0	0	2.99028	0	-2.99028	0.00538616	0.24133
ENSOCUT00000000154	ENSOCUG00000000154	IL13	interleukin 13	ProteinCodingRNA	1.42753	2.58437	2.95286	0.99552	0	0	2.32159	0.33184	-1.98975	0.0309632	0.534726
ENSOCUT00000017885	ENSOCUG00000017882	ANO3	anoctamin 3	ProteinCodingRNA	7.72375	7.383	5.94685	6.46686	5.74493	5.80882	7.01786	6.00687	-1.01099	0.0194999	0.439239
ENSOCUT00000007107	ENSOCUG00000007108	GALNT17	polypeptide N-acetylgalactosaminyltransferase 17	ProteinCodingRNA	5.31711	5.75419	5.89331	4.16145	5.26481	4.41896	5.65487	4.61507	-1.03979	0.0204355	0.447969
ENSOCUT00000014278	ENSOCUG00000014255	DUOX2	dual oxidase 2	ProteinCodingRNA	6.06403	5.61401	6.02363	5.57618	8.74522	8.15198	5.90056	7.49113	1.59057	0.00199623	0.13813
ENSOCUT00000000905	ENSOCUG00000000905	NPAS4	neuronal PAS domain protein 4	ProteinCodingRNA	0	0	2.1281	0	5.33884	4.93393	0.709366	3.42426	2.71489	0.0241715	0.475593
ENSOCUT00000013556	ENSOCUG00000013559	SLAMF7	SLAM family member 7	ProteinCodingRNA	4.09201	4.08679	4.97005	4.99131	6.42653	4.98127	4.38295	5.46637	1.08341	0.0353154	0.561616
ENSOCUT00000021543	ENSOCUG00000007427	FAT3	FAT atypical cadherin 3	ProteinCodingRNA	11.3358	11.2584	11.6667	11.093	9.30271	8.61285	11.4203	9.66952	-1.7508	0.0134816	0.371188
ENSOCUT00000029974	ENSOCUG00000015244	---	---	ProteinCodingRNA	4.93416	5.24723	4.48235	5.54581	6.85008	6.64239	4.88791	6.34609	1.45818	0.000684331	0.0726639
ENSOCUT00000013986	ENSOCUG00000013971	AOX1	aldehyde oxidase 1	ProteinCodingRNA	10.8998	11.2835	11.3971	10.394	13.5227	13.1938	11.1935	12.3702	1.17669	0.0417514	0.597152
ENSOCUT00000005751	ENSOCUG00000005753	ROPN1L	rhophilin associated tail protein 1 like	ProteinCodingRNA	2.13084	2.32136	1.69938	3.16195	3.60086	3.61062	2.05052	3.45781	1.40729	0.0275129	0.512236
ENSOCUT00000010763	ENSOCUG00000010766	LAMP5	lysosomal associated membrane protein family member 5	ProteinCodingRNA	4.8093	4.64317	5.20796	3.57674	2.01302	0	4.88681	1.86325	-3.02355	0.00388959	0.198313
ENSOCUT00000010505	ENSOCUG00000010507	NPR3	natriuretic peptide receptor 3	ProteinCodingRNA	9.01943	9.02443	9.99635	9.00506	7.5871	7.57471	9.34673	8.05563	-1.29111	0.0103284	0.334049
ENSOCUT00000014420	ENSOCUG00000014421	MPZ	myelin protein zero	ProteinCodingRNA	11.0032	10.4981	11.1072	8.74927	10.6126	10.2029	10.8695	9.85491	-1.01458	0.0492518	0.640609
ENSOCUT00000016352	ENSOCUG00000016348	KCNH8	potassium voltage-gated channel subfamily H member 8	ProteinCodingRNA	0	0	0	2.57749	2.01302	2.02102	0	2.20384	2.20384	0.0159667	0.402411
ENSOCUT00000012627	ENSOCUG00000012629	CLDN2	claudin 2	ProteinCodingRNA	1.82162	2.58437	2.45817	3.31385	4.60158	4.61177	2.28805	4.17574	1.88768	0.00233942	0.153734
ENSOCUT00000022103	ENSOCUG00000026636	MYH1	myosin-4	ProteinCodingRNA	6.62953	6.64315	1.69938	2.31475	2.01302	2.02102	4.99068	2.11627	-2.87442	0.000130823	0.0241791
ENSOCUT00000022220	ENSOCUG00000025171	NBR1	NBR1, autophagy cargo receptor	ProteinCodingRNA	3.10507	3.45878	3.85655	10.5166	0	3.34712	3.47347	4.62122	1.14776	0.0212323	0.453941
ENSOCUT00000012325	ENSOCUG00000012324	ALPK2	alpha kinase 2	ProteinCodingRNA	5.69197	5.45873	5.99849	4.51498	3.82346	4.93393	5.7164	4.42412	-1.29227	0.00202481	0.13813
ENSOCUT00000015670	ENSOCUG00000015676	---	---	ProteinCodingRNA	0	1.58449	0	0	4.47599	4.67071	0.528162	3.0489	2.52074	0.0217857	0.456368
ENSOCUT00000010246	ENSOCUG00000010247	ATP6V0D2	ATPase H+ transporting V0 subunit d2	ProteinCodingRNA	3.94146	4.16925	3.96434	6.27654	9.61164	5.38484	4.02502	7.09101	3.06599	6.86875e-06	0.00199791
ENSOCUT00000033245	ENSOCUG00000014647	USP15	ubiquitin specific peptidase 15	ProteinCodingRNA	7.8716	3.32129	4.06464	3.31385	3.82346	3.48487	5.08584	3.54073	-1.54511	0.00660477	0.268938
ENSOCUT00000005443	ENSOCUG00000005445	---	---	ProteinCodingRNA	7.70634	8.61031	9.86864	7.84281	7.51709	7.51966	8.72843	7.62652	-1.10191	0.00674632	0.272755
ENSOCUT00000025029	ENSOCUG00000023343	PCSK9	proprotein convertase subtilisin/kexin type 9	ProteinCodingRNA	1.42753	1.58449	0	1.57899	3.18535	4.1138	1.00401	2.95938	1.95537	0.0288159	0.52475
ENSOCUT00000022036	ENSOCUG00000022732	---	---	ProteinCodingRNA	3.94146	4.16925	3.6133	4.57636	5.26481	5.15645	3.908	4.99921	1.09121	0.00881456	0.314394
ENSOCUT00000033878	ENSOCUG00000010309	RPL14	ribosomal protein L14	ProteinCodingRNA	0	0	0	0	0	11.0832	0	3.69441	3.69441	1.17994e-10	1.39572e-07
ENSOCUT00000015532	ENSOCUG00000015536	CXXC4	CXXC finger protein 4	ProteinCodingRNA	2.78963	3.58431	3.85655	3.79902	4.82408	5.11461	3.41016	4.57924	1.16908	0.032118	0.543943
ENSOCUT00000001091	ENSOCUG00000001090	MMP27	matrix metallopeptidase 27	ProteinCodingRNA	10.5652	10.3623	10.1398	9.93208	8.08336	9.1572	10.3558	9.05755	-1.29822	0.00714879	0.281244
ENSOCUT00000033498	ENSOCUG00000001351	CD96	CD96 molecule	ProteinCodingRNA	0	0	5.75003	0	0	0	1.91668	0	-1.91668	0.0451426	0.620478
ENSOCUT00000028342	ENSOCUG00000022877	---	---	ProteinCodingRNA	0	0	0	0	3.71645	3.72627	0	2.48091	2.48091	0.0195465	0.439239
ENSOCUT00000015440	ENSOCUG00000015439	RASGRP3	RAS guanyl releasing protein 3	ProteinCodingRNA	4.97349	6.04369	6.2321	6.34869	6.58701	7.84802	5.74976	6.92791	1.17814	0.0186381	0.431234
ENSOCUT00000030686	ENSOCUG00000016813	OLR1	oxidized low-density lipoprotein receptor 1	ProteinCodingRNA	2.78963	3.69978	4.15842	3.99159	5.50881	4.93393	3.54928	4.81144	1.26217	0.0311142	0.534941
ENSOCUT00000001245	ENSOCUG00000024128	---	---	ProteinCodingRNA	3.58305	4.24725	4.74671	3.79902	6.86268	6.29439	4.19234	5.65203	1.45969	0.0134482	0.371188
ENSOCUT00000025580	ENSOCUG00000024244	CCR4	C-C motif chemokine receptor 4	ProteinCodingRNA	1.42753	4.58428	5.16341	1.57899	2.01302	0	3.72507	1.19734	-2.52774	0.00681472	0.27356
ENSOCUT00000031353	ENSOCUG00000026819	RXFP4	relaxin/insulin like family peptide receptor 4	ProteinCodingRNA	2.78963	3.45878	2.1281	2.99215	5.37447	5.98171	2.79217	4.78278	1.99061	0.00424834	0.210554
ENSOCUT00000024328	ENSOCUG00000007445	PMP2	Myelin P2 protein	ProteinCodingRNA	8.32745	6.94181	7.59373	6.07862	4.54015	4.48613	7.621	5.03497	-2.58603	7.88255e-06	0.00225581
ENSOCUT00000030000	ENSOCUG00000017621	ECD	ecdysoneless cell cycle regulator	ProteinCodingRNA	5.64403	0	0	0	0	1.01405	1.88134	0.338016	-1.54333	0.0473305	0.63144
ENSOCUT00000006842	ENSOCUG00000006839	PGBD5	piggyBac transposable element derived 5	ProteinCodingRNA	2.13084	2.32136	1.08665	2.57749	5.0168	4.1138	1.84628	3.90269	2.05641	0.00630112	0.263659
ENSOCUT00000007706	ENSOCUG00000007706	---	---	ProteinCodingRNA	3.77336	3.80669	5.29312	4.63524	6.10455	6.71419	4.29106	5.81799	1.52694	0.0196582	0.440399
ENSOCUT00000026218	ENSOCUG00000024206	KCNJ3	potassium voltage-gated channel subfamily J member 3	ProteinCodingRNA	4.57368	3.58431	5.16341	3.45128	7.27461	7.20768	4.44047	5.97786	1.53739	0.0143498	0.383446
ENSOCUT00000003656	ENSOCUG00000003658	CCR1	C-C motif chemokine receptor 1	ProteinCodingRNA	2.78963	3.80669	4.24647	3.79902	6.61707	4.61177	3.61426	5.00929	1.39503	0.0293286	0.525628
ENSOCUT00000005598	ENSOCUG00000005589	ZAN	zonadhesin precursor	ProteinCodingRNA	5.31711	3.45878	4.55312	0	0	2.83136	4.443	0.943785	-3.49922	0.00510707	0.232345
ENSOCUT00000009939	ENSOCUG00000009917	---	---	ProteinCodingRNA	6.00831	5.24723	5.11745	6.45056	8.07256	7.62773	5.45766	7.38362	1.92595	3.23284e-05	0.00796671
ENSOCUT00000026794	ENSOCUG00000023136	---	---	ProteinCodingRNA	5.08543	4.99931	6.09652	5.38356	8.0285	7.33157	5.39375	6.91454	1.52079	0.00635358	0.263659
ENSOCUT00000029605	ENSOCUG00000022822	GBX1	gastrulation brain homeobox 1	ProteinCodingRNA	1.82162	1.58449	1.69938	2.99215	4.54015	4.72734	1.70183	4.08655	2.38472	0.000573736	0.0628382
ENSOCUT00000005512	ENSOCUG00000005513	FKBP5	FK506 binding protein 5	ProteinCodingRNA	10.1526	11.1655	11.7959	10.5341	14.2945	13.7159	11.038	12.8481	1.81016	0.0199948	0.443952
ENSOCUT00000008432	ENSOCUG00000008429	---	---	ProteinCodingRNA	5.64403	6.02167	6.48833	4.63524	4.87473	5.31265	6.05134	4.94087	-1.11047	0.00281723	0.166996
ENSOCUT00000009212	ENSOCUG00000009212	CD1A	T-cell surface glycoprotein CD1a precursor	ProteinCodingRNA	0	5.12859	4.97005	1.57899	1.0087	1.60366	3.36621	1.39712	-1.9691	0.0122775	0.35878
ENSOCUT00000030396	ENSOCUG00000025499	---	---	ProteinCodingRNA	2.78963	3.16929	4.15842	4.51498	4.40884	4.55032	3.37245	4.49138	1.11893	0.0475311	0.633142
ENSOCUT00000010281	ENSOCUG00000010283	---	---	ProteinCodingRNA	5.8053	5.42557	5.71959	4.3134	4.01626	5.38484	5.65015	4.5715	-1.07865	0.0340975	0.555548
ENSOCUT00000005836	ENSOCUG00000005836	NRG1	neuregulin 1	ProteinCodingRNA	10.6744	10.1065	9.91472	9.95393	8.52112	8.86079	10.2319	9.11195	-1.11993	0.010212	0.333685
ENSOCUT00000006176	ENSOCUG00000006177	GPR151	G protein-coupled receptor 151	ProteinCodingRNA	1.82162	1.58449	0	2.99215	4.92366	5.15645	1.13537	4.35742	3.22205	0.000195661	0.0327511
ENSOCUT00000004160	ENSOCUG00000004160	FAM107A	family with sequence similarity 107 member A	ProteinCodingRNA	7.044	6.64315	6.90837	6.1409	8.98597	8.53171	6.86517	7.88619	1.02102	0.0193413	0.43772
ENSOCUT00000033547	ENSOCUG00000029189	IQCF3	IQ motif containing F3	ProteinCodingRNA	2.13084	0	0	3.45128	3.92308	3.34712	0.710279	3.57382	2.86355	0.00641955	0.263659
ENSOCUT00000027310	ENSOCUG00000017832	TRPC6	transient receptor potential cation channel subfamily C member 6	ProteinCodingRNA	3.94146	3.58431	2.95286	4.57636	4.60158	4.78182	3.49288	4.65326	1.16038	0.0159415	0.402347
ENSOCUT00000028664	ENSOCUG00000022188	---	---	ProteinCodingRNA	2.6016	0.999643	2.45817	0	0	0	2.0198	0	-2.0198	0.0335856	0.552791
ENSOCUT00000007981	ENSOCUG00000007985	STC2	stanniocalcin 2	ProteinCodingRNA	6.3143	5.12859	5.6242	5.87382	9.97152	9.2398	5.68903	8.36171	2.67268	0.00103616	0.0933226
ENSOCUT00000007987	ENSOCUG00000007989	SPATA18	spermatogenesis associated 18	ProteinCodingRNA	4.22832	5.0437	5.29312	3.79902	3.4752	4.02623	4.85505	3.76682	-1.08823	0.0182698	0.430881
ENSOCUT00000030950	ENSOCUG00000027991	SAPCD1	suppressor APC domain containing 1	ProteinCodingRNA	5.91037	5.39162	5.80906	5.03569	3.01518	3.61062	5.70369	3.88716	-1.81652	0.00636545	0.263659
ENSOCUT00000030954	ENSOCUG00000023791	CCR10	C-C motif chemokine receptor 10	ProteinCodingRNA	3.58305	0.999643	2.1281	4.23943	4.33841	3.83334	2.23693	4.13706	1.90013	0.0441376	0.614223
ENSOCUT00000025774	ENSOCUG00000007837	LRRC39	leucine rich repeat containing 39	ProteinCodingRNA	2.38533	2.58437	2.95286	2.57749	5.22633	4.55032	2.64085	4.11804	1.47719	0.0174628	0.422964
ENSOCUT00000031801	ENSOCUG00000005490	AAR2	AAR2 splicing factor homolog	ProteinCodingRNA	2.13084	2.32136	1.69938	5.03569	2.82223	5.27516	2.05052	4.37769	2.32717	0.000817116	0.0837234
ENSOCUT00000004517	ENSOCUG00000004518	EFCAB1	EF-hand calcium binding domain 1	ProteinCodingRNA	1.42753	0	0	3.31385	1.59655	2.6083	0.475843	2.50623	2.03039	0.0482853	0.635979
ENSOCUT00000002916	ENSOCUG00000002916	TRAT1	T cell receptor associated transmembrane adaptor 1	ProteinCodingRNA	2.38533	2.80674	2.95286	0	0	1.60366	2.71498	0.534555	-2.18042	0.0322136	0.544398
ENSOCUT00000017119	ENSOCUG00000017120	PDK4	pyruvate dehydrogenase kinase 4	ProteinCodingRNA	9.74016	10.5228	10.4857	10.6222	12.8804	12.2004	10.2496	11.901	1.65142	0.000159367	0.0285621
ENSOCUT00000033563	ENSOCUG00000007060	DCST1	DC-STAMP domain containing 1	ProteinCodingRNA	3.58305	3.90623	4.68502	3.16195	6.509	5.83482	4.0581	5.16859	1.11049	0.0481395	0.635349
ENSOCUT00000003082	ENSOCUG00000003082	P2RX3	purinergic receptor P2X 3	ProteinCodingRNA	3.10507	5.12859	5.6567	5.74608	6.37468	6.43703	4.63012	6.18593	1.55581	0.0438179	0.613287
ENSOCUT00000009566	ENSOCUG00000009566	S100A8	S100 calcium binding protein A8	ProteinCodingRNA	5.01178	5.80665	8.62326	6.01353	4.77159	5.19712	6.48057	5.32741	-1.15315	0.0295596	0.525628
ENSOCUT00000030065	ENSOCUG00000014829	SYT1	synaptotagmin 1	ProteinCodingRNA	6.02712	5.80665	5.59095	5.54581	4.01626	4.48613	5.80824	4.68273	-1.12551	0.0354925	0.561906
ENSOCUT00000007268	ENSOCUG00000007268	TREML2	triggering receptor expressed on myeloid cells like 2	ProteinCodingRNA	4.41131	5.39162	4.48235	4.74625	5.87502	6.86061	4.76176	5.82729	1.06553	0.0429532	0.605337
ENSOCUT00000031822	ENSOCUG00000023897	---	---	ProteinCodingRNA	3.10507	1.58449	2.72661	2.99215	4.47599	4.27443	2.47206	3.91419	1.44213	0.0405501	0.588773
ENSOCUT00000001638	ENSOCUG00000001638	HPSE2	heparanase 2 (inactive)	ProteinCodingRNA	6.7248	5.64316	5.55692	5.31318	4.60158	3.61062	5.97496	4.50846	-1.4665	0.0123827	0.35878
ENSOCUT00000009041	ENSOCUG00000009030	PKD1L3	polycystin 1 like 3, transient receptor potential channel interacting	ProteinCodingRNA	3.24021	3.69978	3.32054	3.45128	5.06121	5.15645	3.42018	4.55631	1.13614	0.0295793	0.525628
ENSOCUT00000021400	ENSOCUG00000020987	ADAM1A	fertilin alpha subunit	ProteinCodingRNA	3.24021	3.90623	3.6133	2.99215	5.87502	5.3492	3.58658	4.73879	1.15221	0.0368309	0.572952
ENSOCUT00000002933	ENSOCUG00000002935	FAM46C	family with sequence similarity 46 member C	ProteinCodingRNA	10.1537	10.2496	10.6997	9.67579	9.24372	9.15462	10.3677	9.35804	-1.00961	5.09709e-06	0.00158663
ENSOCUT00000033664	ENSOCUG00000008708	GSTO2	glutathione S-transferase omega 2	ProteinCodingRNA	4.41131	3.80669	3.96434	4.63524	5.94779	5.31265	4.06078	5.29856	1.23778	0.00753496	0.287524
ENSOCUT00000000984	ENSOCUG00000000984	ESRRG	estrogen related receptor gamma	ProteinCodingRNA	6.51424	6.06539	5.89331	5.31318	4.87473	4.61177	6.15764	4.93323	-1.22442	0.000429418	0.0529109
ENSOCUT00000008803	ENSOCUG00000008806	SPINK6	serine peptidase inhibitor, Kazal type 6	ProteinCodingRNA	4.71961	3.16929	2.95286	0.99552	1.0087	0	3.61392	0.668072	-2.94585	0.00128447	0.106933
ENSOCUT00000024285	ENSOCUG00000022705	CCDC63	coiled-coil domain containing 63	ProteinCodingRNA	0	0	0	2.57749	3.01518	3.0245	0	2.87239	2.87239	0.00093972	0.0895175
ENSOCUT00000001716	ENSOCUG00000001716	PFKFB1	6-phosphofructo-2-kinase/fructose-2,6-biphosphatase 1	ProteinCodingRNA	6.23561	7.32122	7.54247	5.12057	5.99435	5.86037	7.0331	5.65843	-1.37467	0.00110208	0.0958541
ENSOCUT00000013162	ENSOCUG00000029126	---	---	ProteinCodingRNA	1.82162	3.32129	3.32054	1.57899	0	0	2.82115	0.526329	-2.29482	0.0256331	0.49382
ENSOCUT00000031716	ENSOCUG00000022574	FAM163A	family with sequence similarity 163 member A	ProteinCodingRNA	4.76515	4.32125	2.1281	5.31318	4.87473	6.02753	3.73817	5.40514	1.66698	0.0455492	0.621053
ENSOCUT00000028289	ENSOCUG00000000268	PCDH15	protocadherin related 15	ProteinCodingRNA	6.74767	6.52286	5.77985	5.54581	3.92308	5.86037	6.35013	5.10975	-1.24037	0.0456086	0.621053
ENSOCUT00000004729	ENSOCUG00000004727	CLCA2	chloride channel accessory 2	ProteinCodingRNA	8.96192	8.71697	8.44865	8.92474	10.4727	10.1534	8.70918	9.85025	1.14107	0.000955983	0.0897461
ENSOCUT00000010524	ENSOCUG00000010524	RBP4	retinol-binding protein 4 precursor	ProteinCodingRNA	11.5477	11.5248	11.5998	11.0354	9.87219	9.44999	11.5575	10.1192	-1.43826	0.000852473	0.0840302
ENSOCUT00000007926	ENSOCUG00000007895	DNAH1	dynein axonemal heavy chain 1	ProteinCodingRNA	6.68981	6.40869	6.72128	6.79846	8.03408	7.98785	6.60659	7.6068	1.00021	0.00324636	0.180001
ENSOCUT00000012601	ENSOCUG00000012601	MARCH10	membrane associated ring-CH-type finger 10	ProteinCodingRNA	3.77336	3.16929	3.47433	3.79902	4.77159	5.0271	3.47233	4.53257	1.06024	0.0332892	0.551917
ENSOCUT00000033693	ENSOCUG00000029618	---	---	ProteinCodingRNA	4.52156	4.64317	4.97005	3.79902	3.92308	1.60366	4.7116	3.10859	-1.60301	0.0392122	0.585048
ENSOCUT00000008823	ENSOCUG00000008826	---	---	ProteinCodingRNA	5.59443	6.58426	6.64233	5.60592	3.82346	4.88499	6.27367	4.77146	-1.50222	0.0092669	0.321302
ENSOCUT00000006073	ENSOCUG00000006076	C9orf40	chromosome 9 open reading frame 40	ProteinCodingRNA	5.31711	4.08679	4.32946	3.79902	3.4752	2.83136	4.57779	3.36853	-1.20926	0.0262651	0.496886
ENSOCUT00000006078	ENSOCUG00000006075	SLC9A4	solute carrier family 9 member A4	ProteinCodingRNA	4.22832	3.32129	2.1281	0	2.01302	0	3.2259	0.671008	-2.55489	0.019557	0.439239
ENSOCUT00000001861	ENSOCUG00000001864	AQP8	aquaporin 8	ProteinCodingRNA	5.08543	5.64316	6.62601	3.99159	0	2.6083	5.78487	2.19996	-3.5849	0.00100174	0.0925719
ENSOCUT00000001865	ENSOCUG00000001866	CLEC3A	C-type lectin domain family 3 member A	ProteinCodingRNA	9.50875	11.7036	11.7439	9.67052	9.92871	10.1928	10.9854	9.93069	-1.05472	0.00771389	0.28956
ENSOCUT00000003593	ENSOCUG00000003592	ATN1	atrophin 1	ProteinCodingRNA	9.06793	9.29391	11.7775	8.93062	8.89689	8.97919	10.0465	8.93557	-1.11088	0.0488321	0.637881
ENSOCUT00000005038	ENSOCUG00000005039	CA1	carbonic anhydrase 1	ProteinCodingRNA	5.34737	6.06539	6.9218	4.45087	4.97098	2.6083	6.11152	4.01005	-2.10147	0.00372805	0.193979
ENSOCUT00000028848	ENSOCUG00000009646	---	---	ProteinCodingRNA	8.11526	9.0161	7.58531	8.62041	9.77554	10.8505	8.23889	9.74882	1.50993	0.00312275	0.174785
ENSOCUT00000009291	ENSOCUG00000009290	PLEKHG7	pleckstrin homology and RhoGEF domain containing G7	ProteinCodingRNA	4.0187	4.16925	0	0	0	0	2.72932	0	-2.72932	0.00946198	0.325374
ENSOCUT00000024022	ENSOCUG00000027152	---	---	ProteinCodingRNA	3.68134	4.69975	4.97005	5.3488	5.84993	5.80882	4.45038	5.66918	1.2188	0.00781722	0.292002
ENSOCUT00000004745	ENSOCUG00000004746	SPATA16	spermatogenesis associated 16	ProteinCodingRNA	1.42753	1.99947	2.72661	0	0	0	2.0512	0	-2.0512	0.0291941	0.525628
ENSOCUT00000016691	ENSOCUG00000016685	NOX4	NADPH oxidase 4	ProteinCodingRNA	4.67259	4.64317	5.06997	4.23943	6.16684	7.24694	4.79524	5.88441	1.08916	0.0281868	0.519364
ENSOCUT00000015312	ENSOCUG00000015310	MS4A10	membrane spanning 4-domains A10	ProteinCodingRNA	2.78963	2.58437	2.95286	0	0	0	2.77562	0	-2.77562	0.00154741	0.119894
ENSOCUT00000000613	ENSOCUG00000000616	SCRG1	stimulator of chondrogenesis 1	ProteinCodingRNA	5.08543	5.12859	5.20796	5.60592	6.75865	6.74194	5.14066	6.36884	1.22818	0.000943458	0.0895175
ENSOCUT00000003903	ENSOCUG00000003905	CYR61	cysteine rich angiogenic inducer 61	ProteinCodingRNA	10.8895	11.8456	11.874	11.7138	13.7216	13.5998	11.5364	13.0117	1.47539	0.000930734	0.0895175
ENSOCUT00000017962	ENSOCUG00000017963	PRPH2	peripherin 2	ProteinCodingRNA	0	0	0	0	3.4752	3.93301	0	2.4694	2.4694	0.0198751	0.442465
ENSOCUT00000009882	ENSOCUG00000009885	SLC13A5	solute carrier family 13 member 5	ProteinCodingRNA	3.77336	3.58431	3.96434	2.57749	0	2.83136	3.774	1.80295	-1.97106	0.0429508	0.605337
ENSOCUT00000012950	ENSOCUG00000012952	---	---	ProteinCodingRNA	2.13084	2.80674	3.32054	1.57899	0	0	2.75271	0.526329	-2.22638	0.0296584	0.525628
ENSOCUT00000010698	ENSOCUG00000010701	HEMGN	hemogen	ProteinCodingRNA	5.54307	6.39161	7.28618	4.99131	5.40925	5.19712	6.40695	5.19922	-1.20773	0.00559528	0.246958
ENSOCUT00000009087	ENSOCUG00000009080	PMFBP1	polyamine modulated factor 1 binding protein 1	ProteinCodingRNA	1.42753	0	0	1.57899	3.82346	3.93301	0.475843	3.11182	2.63597	0.00973706	0.328167
ENSOCUT00000008737	ENSOCUG00000008738	ABL2	ABL proto-oncogene 2, non-receptor tyrosine kinase	ProteinCodingRNA	0	0	0	0	0	10.3317	0	3.44391	3.44391	6.36658e-10	6.27568e-07
ENSOCUT00000006899	ENSOCUG00000006901	ANKRD1	ankyrin repeat domain-containing protein 1	ProteinCodingRNA	1.42753	0	2.1281	2.57749	4.26436	4.19635	1.18521	3.6794	2.49419	0.00483185	0.225466
ENSOCUT00000008841	ENSOCUG00000008835	---	---	ProteinCodingRNA	1.82162	2.99938	2.95286	4.23943	3.01518	4.48613	2.59129	3.91358	1.3223	0.0409791	0.589694
ENSOCUT00000029367	ENSOCUG00000006885	SLC30A2	solute carrier family 30 member 2	ProteinCodingRNA	0	0	1.08665	0	3.82346	3.83334	0.362216	2.55227	2.19005	0.022514	0.46204
ENSOCUT00000020977	ENSOCUG00000027438	---	---	ProteinCodingRNA	4.41131	3.16929	4.06464	5.12057	5.14613	4.72734	3.88175	4.99801	1.11626	0.0238493	0.475315
ENSOCUT00000022718	ENSOCUG00000025138	---	---	ProteinCodingRNA	0	0	1.08665	0	5.33884	4.67071	0.362216	3.33652	2.9743	0.00289518	0.168195
ENSOCUT00000012455	ENSOCUG00000012452	ADGRF3	adhesion G protein-coupled receptor F3	ProteinCodingRNA	1.42753	0	2.1281	0	5.26481	4.88499	1.18521	3.38327	2.19806	0.02225	0.458866
ENSOCUT00000007902	ENSOCUG00000007903	TECTB	tectorin beta	ProteinCodingRNA	1.82162	1.99947	2.45817	2.31475	4.92366	4.34851	2.09309	3.8623	1.76922	0.00923106	0.321302
ENSOCUT00000007905	ENSOCUG00000007906	FCRLA	Fc receptor like A	ProteinCodingRNA	0	2.99938	3.85655	0	0	0	2.28531	0	-2.28531	0.0347456	0.559474
ENSOCUT00000013857	ENSOCUG00000013850	PDE6A	phosphodiesterase 6A	ProteinCodingRNA	4.46749	4.52288	4.15842	4.74625	5.68943	5.83482	4.38293	5.4235	1.04057	0.0103737	0.334049
ENSOCUT00000023192	ENSOCUG00000027689	ASIC3	acid sensing ion channel subunit 3	ProteinCodingRNA	2.38533	2.58437	3.47433	3.16195	4.40884	4.55032	2.81468	4.04037	1.22569	0.0462177	0.623986
ENSOCUT00000009396	ENSOCUG00000009399	CA4	carbonic anhydrase 4 precursor	ProteinCodingRNA	4.62398	3.99933	3.32054	3.99159	6.24593	5.45358	3.98129	5.23037	1.24908	0.0353678	0.561616
ENSOCUT00000004764	ENSOCUG00000004764	LGI2	leucine rich repeat LGI family member 2	ProteinCodingRNA	3.10507	2.99938	3.85655	0	0	2.34434	3.32033	0.781447	-2.53888	0.030569	0.532023
ENSOCUT00000014507	ENSOCUG00000014505	TRIB3	tribbles pseudokinase 3	ProteinCodingRNA	5.31711	4.9062	3.96434	5.31318	5.94779	5.93439	4.72922	5.73179	1.00257	0.039177	0.585048
ENSOCUT00000026905	ENSOCUG00000022646	---	---	ProteinCodingRNA	5.1209	6.04369	7.66735	5.23919	3.60086	3.19481	6.27731	4.01162	-2.26569	0.00302271	0.171415
ENSOCUT00000031011	ENSOCUG00000027316	HOXB9	homeobox B9	ProteinCodingRNA	2.78963	1.99947	2.95286	0	0	0	2.58065	0	-2.58065	0.00406641	0.205557
ENSOCUT00000000551	ENSOCUG00000000551	TGM5	transglutaminase 5	ProteinCodingRNA	10.0074	10.216	10.6651	10.313	12.5753	11.6381	10.2962	11.5088	1.21257	0.00291889	0.168697
ENSOCUT00000033017	ENSOCUG00000029060	C17orf107	chromosome 17 open reading frame 107	ProteinCodingRNA	0	0	1.08665	1.99327	3.92308	3.48487	0.362216	3.13374	2.77153	0.0024337	0.157219
ENSOCUT00000026342	ENSOCUG00000025586	MYL2	myosin light chain 2	ProteinCodingRNA	2.78963	4.24725	0	0	0	0	2.34563	0	-2.34563	0.0235501	0.47429
ENSOCUT00000017733	ENSOCUG00000017732	CDH18	cadherin 18	ProteinCodingRNA	6.06403	5.24723	5.59095	4.3134	2.01302	2.02102	5.63407	2.78248	-2.85159	0.000634984	0.0679814
ENSOCUT00000033659	ENSOCUG00000029519	EPHA6	EPH receptor A6	ProteinCodingRNA	4.41131	4.85729	3.6133	1.99327	0	0	4.29397	0.664425	-3.62954	0.00014346	0.0262414
ENSOCUT00000003140	ENSOCUG00000003144	BPGM	Bisphosphoglycerate mutase	ProteinCodingRNA	9.23705	9.45256	10.2464	8.81122	8.39233	8.33166	9.64533	8.51174	-1.1336	0.000108819	0.0214531
ENSOCUT00000031156	ENSOCUG00000021680	---	---	ProteinCodingRNA	0	0	0	4.3134	0	4.1138	0	2.80907	2.80907	0.00779985	0.291968
ENSOCUT00000029345	ENSOCUG00000025424	COX4I2	cytochrome c oxidase subunit 4I2	ProteinCodingRNA	4.35286	4.45875	4.68502	4.51498	5.92394	6.09364	4.49888	5.51085	1.01198	0.0208361	0.450299
ENSOCUT00000022595	ENSOCUG00000011583	MCMDC2	minichromosome maintenance domain containing 2	ProteinCodingRNA	4.22832	4.58428	4.74671	5.1612	6.42653	6.56682	4.51977	6.05152	1.53175	0.000494703	0.0573694
ENSOCUT00000008103	ENSOCUG00000008104	GDF6	growth differentiation factor 6	ProteinCodingRNA	2.78963	2.58437	3.14838	0	0	1.60366	2.84079	0.534555	-2.30624	0.0217426	0.456368
ENSOCUT00000028991	ENSOCUG00000013722	PAWR	pro-apoptotic WT1 regulator	ProteinCodingRNA	3.24021	3.45878	9.0899	3.45128	2.82223	3.61062	5.26296	3.29471	-1.96826	0.0075069	0.287524
ENSOCUT00000025924	ENSOCUG00000025111	GALNT15	polypeptide N-acetylgalactosaminyltransferase 15	ProteinCodingRNA	7.93274	8.20874	8.33776	6.59103	11.6089	11.3561	8.15975	9.85198	1.69224	0.015155	0.392549
ENSOCUT00000005787	ENSOCUG00000005788	SLC22A7	solute carrier family 22 member 7	ProteinCodingRNA	6.96814	7.05457	6.78147	6.63497	4.47599	4.67071	6.93473	5.26056	-1.67417	0.0269982	0.505305
ENSOCUT00000007777	ENSOCUG00000007762	SPTA1	spectrin alpha, erythrocytic 1	ProteinCodingRNA	4.62398	5.93004	7.06187	4.57636	4.10379	5.11461	5.87196	4.59825	-1.27371	0.0193386	0.43772
ENSOCUT00000027188	ENSOCUG00000027363	C1orf185	chromosome 1 open reading frame 185	ProteinCodingRNA	1.82162	1.99947	2.1281	0	0	0	1.98306	0	-1.98306	0.0354621	0.561906
ENSOCUT00000007559	ENSOCUG00000007559	TRPV5	Transient receptor potential cation channel subfamily V member 5	ProteinCodingRNA	6.2676	6.91816	7.22247	6.84908	10.2605	9.6408	6.80274	8.91679	2.11405	0.000130446	0.0241791
ENSOCUT00000012805	ENSOCUG00000012804	---	---	ProteinCodingRNA	2.38533	0	2.95286	2.99215	5.47638	4.78182	1.7794	4.41678	2.63739	0.0077192	0.28956
ENSOCUT00000011129	ENSOCUG00000011126	HPSE	heparanase	ProteinCodingRNA	7.05321	7.74076	7.92921	7.36612	6.10455	6.23704	7.57439	6.56924	-1.00515	0.0302496	0.528474
ENSOCUT00000011121	ENSOCUG00000011124	FGF18	fibroblast growth factor 18	ProteinCodingRNA	5.43451	5.97658	5.75003	6.2006	7.33916	7.07215	5.72037	6.87064	1.15026	0.00128774	0.106933
ENSOCUT00000005331	ENSOCUG00000005334	ELOVL4	ELOVL fatty acid elongase 4	ProteinCodingRNA	10.7808	11.5277	11.5357	11.3655	12.5533	13.0124	11.2814	12.3104	1.02899	0.0052433	0.236122
ENSOCUT00000000605	ENSOCUG00000000605	---	---	ProteinCodingRNA	0.883565	0	3.74004	2.79967	5.66085	5.95825	1.5412	4.80625	3.26505	0.0177779	0.425111
ENSOCUT00000027409	ENSOCUG00000000901	SEZ6L2	seizure related 6 homolog like 2	ProteinCodingRNA	2.13084	3.45878	2.45817	3.99159	5.26481	4.78182	2.6826	4.67941	1.99681	0.00148287	0.117099
ENSOCUT00000015147	ENSOCUG00000015153	TMEM196	transmembrane protein 196	ProteinCodingRNA	3.10507	3.80669	3.85655	0	1.59655	0	3.58944	0.532182	-3.05725	0.00146608	0.116648
ENSOCUT00000003683	ENSOCUG00000003684	C16orf45	chromosome 16 open reading frame 45	ProteinCodingRNA	2.6016	1.58449	4.68502	1.57899	0	1.60366	2.95703	1.06088	-1.89615	0.0324804	0.544707
ENSOCUT00000032159	ENSOCUG00000021944	---	---	ProteinCodingRNA	4.57368	4.85729	4.06464	5.20072	7.64661	7.81574	4.49854	6.88769	2.38915	2.95689e-05	0.00738931
ENSOCUT00000030808	ENSOCUG00000022546	---	---	ProteinCodingRNA	4.62398	2.99938	2.95286	2.31475	2.33582	0	3.52541	1.55019	-1.97522	0.0399124	0.586607
ENSOCUT00000016051	ENSOCUG00000016055	OR10V1	olfactory receptor family 10 subfamily V member 1	ProteinCodingRNA	0	0	0	0	3.71645	2.83136	0	2.1826	2.1826	0.0399297	0.586607
ENSOCUT00000009118	ENSOCUG00000009113	---	---	ProteinCodingRNA	5.59443	5.78066	6.73657	4.45087	5.47638	4.83433	6.03722	4.92052	-1.11669	0.0157386	0.400543
ENSOCUT00000000604	ENSOCUG00000000603	HHIPL2	HHIP like 2	ProteinCodingRNA	7.85063	8.47907	8.66779	7.63493	10.2841	10.4812	8.3325	9.46675	1.13425	0.0116592	0.351286
ENSOCUT00000005133	ENSOCUG00000005136	PON1	serum paraoxonase/arylesterase 1 precursor	ProteinCodingRNA	4.76515	2.80674	4.48235	5.12057	5.54053	5.55092	4.01808	5.404	1.38592	0.0297311	0.525628
ENSOCUT00000024954	ENSOCUG00000026744	---	---	ProteinCodingRNA	0	0.999643	1.69938	2.79967	3.60086	4.19635	0.899673	3.53229	2.63262	0.00246323	0.15778
ENSOCUT00000033615	ENSOCUG00000009198	ERMN	ermin	ProteinCodingRNA	0	0	0	0	3.60086	3.19481	0	2.26522	2.26522	0.0338806	0.553367
ENSOCUT00000030499	ENSOCUG00000009424	LAMA1	laminin subunit alpha 1	ProteinCodingRNA	5.1209	5.64316	6.21037	4.38377	2.33582	3.19481	5.65814	3.3048	-2.35334	0.000397108	0.0503278
ENSOCUT00000027223	ENSOCUG00000027773	TMEM233	transmembrane protein 233	ProteinCodingRNA	4.97349	5.97658	5.6242	3.57674	4.18631	3.93301	5.52476	3.89868	-1.62607	0.000187868	0.0319018
ENSOCUT00000027220	ENSOCUG00000022202	SLC1A1	excitatory amino acid transporter 3	ProteinCodingRNA	8.79632	8.51104	7.7749	9.44225	9.35939	10.0545	8.36076	9.6187	1.25794	0.000111461	0.0217324
ENSOCUT00000031480	ENSOCUG00000025301	CCDC24	coiled-coil domain containing 24	ProteinCodingRNA	2.78963	3.58431	3.32054	3.57674	3.82346	5.72787	3.23149	4.37602	1.14453	0.0481293	0.635349
ENSOCUT00000001856	ENSOCUG00000001857	ZBTB10	zinc finger and BTB domain containing 10	ProteinCodingRNA	0.883565	0.999643	2.1281	1.57899	4.82408	2.02102	1.3371	2.80803	1.47093	0.0494834	0.640865
ENSOCUT00000034048	ENSOCUG00000029297	LMO3	LIM domain only 3	ProteinCodingRNA	3.77336	1.99947	2.72661	1.57899	0	0	2.83315	0.526329	-2.30682	0.024187	0.475593
ENSOCUT00000001007	ENSOCUG00000008730	LRRK1	leucine rich repeat kinase 1	ProteinCodingRNA	7.63455	6.52286	7.95557	5.84916	5.22633	6.62759	7.37099	5.90103	-1.46996	0.00308486	0.173593
ENSOCUT00000024097	ENSOCUG00000006290	LRFN5	leucine rich repeat and fibronectin type III domain containing 5	ProteinCodingRNA	5.18931	5.28471	5.55692	3.79902	3.82346	0	5.34364	2.54083	-2.80282	0.0112007	0.346131
ENSOCUT00000012394	ENSOCUG00000012395	KLHL35	kelch like family member 35	ProteinCodingRNA	3.47757	3.58431	3.14838	3.69216	5.57156	5.64211	3.40342	4.96861	1.56519	0.00440898	0.213157
ENSOCUT00000005479	ENSOCUG00000005473	TTC21A	tetratricopeptide repeat domain 21A	ProteinCodingRNA	3.36376	4.45875	3.96434	5.12057	5.60194	6.50338	3.92895	5.74196	1.81301	0.000456185	0.0543227
ENSOCUT00000013108	ENSOCUG00000013106	VIPR1	vasoactive intestinal peptide receptor 1	ProteinCodingRNA	7.59726	7.83218	7.56833	7.74596	9.75033	9.21527	7.66592	8.90385	1.23793	0.00153799	0.119894
ENSOCUT00000015500	ENSOCUG00000015504	RCVRN	recoverin	ProteinCodingRNA	0	0	0	2.57749	5.3023	4.55032	0	4.14337	4.14337	9.53807e-06	0.00268625
ENSOCUT00000012934	ENSOCUG00000012939	ENPP5	ectonucleotide pyrophosphatase/phosphodiesterase 5 (putative)	ProteinCodingRNA	4.35286	4.39164	5.37354	3.16195	3.60086	3.83334	4.70601	3.53205	-1.17396	0.0182072	0.430881
ENSOCUT00000009030	ENSOCUG00000009032	CA14	carbonic anhydrase 14	ProteinCodingRNA	2.13084	3.80669	0	3.45128	5.14613	5.23667	1.97918	4.61136	2.63218	0.0321283	0.543943
ENSOCUT00000030541	ENSOCUG00000003998	FMN2	formin 2	ProteinCodingRNA	0	0	0	5.03569	4.60158	0	0	3.21243	3.21243	0.00236503	0.154844
ENSOCUT00000005801	ENSOCUG00000005798	GALNT14	polypeptide N-acetylgalactosaminyltransferase 14	ProteinCodingRNA	4.52156	3.69978	5.11745	2.99215	0	3.48487	4.44626	2.15901	-2.28726	0.0406891	0.589344
ENSOCUT00000033969	ENSOCUG00000029286	---	---	ProteinCodingRNA	2.13084	2.58437	2.72661	0	0	0	2.48061	0	-2.48061	0.00579335	0.251324
ENSOCUT00000027443	ENSOCUG00000027207	FANCE	Fanconi anemia complementation group E	ProteinCodingRNA	6.00831	2.99938	0	1.57899	0	0	3.00256	0.526329	-2.47623	0.0136704	0.374311
ENSOCUT00000011538	ENSOCUG00000011538	---	---	ProteinCodingRNA	3.36376	2.32136	2.1281	4.07902	4.26436	3.48487	2.60441	3.94275	1.33835	0.0431865	0.607039
ENSOCUT00000012359	ENSOCUG00000012365	LRP2BP	LRP2 binding protein	ProteinCodingRNA	4.41131	2.99938	4.32946	4.45087	5.4432	6.40267	3.91338	5.43225	1.51887	0.013418	0.371188
ENSOCUT00000027203	ENSOCUG00000025839	RDH5	retinol dehydrogenase 5	ProteinCodingRNA	5.08543	4.85729	5.44971	5.74608	6.16684	6.56682	5.13081	6.15992	1.0291	0.00287447	0.168195
ENSOCUT00000000515	ENSOCUG00000000515	LGALS4	galectin-4	ProteinCodingRNA	6.4034	6.42556	5.94685	6.40052	7.93016	7.78272	6.25861	7.37113	1.11253	0.00444124	0.213173
ENSOCUT00000008170	ENSOCUG00000008173	OPN1SW	opsin 1, short wave sensitive	ProteinCodingRNA	3.94146	3.58431	3.96434	4.3134	5.84993	6.64239	3.83004	5.60191	1.77187	0.0011685	0.0996768
ENSOCUT00000001076	ENSOCUG00000001077	---	---	ProteinCodingRNA	3.47757	4.16925	4.24647	2.31475	1.0087	3.0245	3.96443	2.11598	-1.84845	0.0148447	0.389066
ENSOCUT00000007545	ENSOCUG00000007547	GPR135	G protein-coupled receptor 135	ProteinCodingRNA	3.24021	3.16929	2.72661	0	0	0	3.04537	0	-3.04537	0.000440381	0.0531543
ENSOCUT00000025981	ENSOCUG00000023853	---	---	ProteinCodingRNA	10.1959	10.5955	10.0463	10.7061	11.4352	11.8593	10.2792	11.3335	1.05432	0.000309409	0.0455741
ENSOCUT00000025987	ENSOCUG00000026618	---	---	ProteinCodingRNA	4.22832	4.39164	4.97005	3.31385	3.01518	3.34712	4.53	3.22539	-1.30462	0.00642843	0.263659
ENSOCUT00000013759	ENSOCUG00000013760	NEURL1	neuralized E3 ubiquitin protein ligase 1	ProteinCodingRNA	6.34462	6.24722	7.09782	6.48298	8.37043	8.18774	6.56322	7.68038	1.11716	0.0128461	0.366445
ENSOCUT00000009149	ENSOCUG00000009149	ECHDC3	enoyl-CoA hydratase domain containing 3	ProteinCodingRNA	2.13084	2.80674	2.95286	4.99131	2.59943	5.19712	2.63015	4.26262	1.63247	0.0112449	0.346384
ENSOCUT00000034155	ENSOCUG00000029267	---	---	ProteinCodingRNA	3.10507	3.16929	3.47433	0	0	0	3.24956	0	-3.24956	0.000152799	0.0276643
ENSOCUT00000016899	ENSOCUG00000016777	---	---	ProteinCodingRNA	10.9936	12.0265	10.6102	9.58723	10.1363	10.1521	11.2101	9.95852	-1.25158	0.000276357	0.0415542
ENSOCUT00000029531	ENSOCUG00000021258	---	---	ProteinCodingRNA	0	7.16922	6.88112	0	0	0	4.68344	0	-4.68344	0.0232704	0.471837
ENSOCUT00000017873	ENSOCUG00000017875	XKR4	XK related 4	ProteinCodingRNA	5.43451	4.99931	4.48235	3.57674	3.18535	2.83136	4.97206	3.19781	-1.77424	0.000304357	0.0453799
ENSOCUT00000002447	ENSOCUG00000002452	CALCA	calcitonin related polypeptide alpha	ProteinCodingRNA	3.10507	4.39164	4.32946	2.31475	2.82223	2.83136	3.94205	2.65611	-1.28594	0.028387	0.52032
ENSOCUT00000000087	ENSOCUG00000000087	TLCD2	TLC domain containing 2	ProteinCodingRNA	6.51424	5.9993	4.74671	5.87382	7.24604	7.95266	5.75342	7.02418	1.27076	0.0327733	0.547548
ENSOCUT00000004661	ENSOCUG00000004661	C12orf40	chromosome 12 open reading frame 40	ProteinCodingRNA	4.97349	7.04369	6.83925	4.89822	4.87473	0	6.28548	3.25765	-3.02783	0.0375929	0.577498
ENSOCUT00000016794	ENSOCUG00000016795	AGPAT4	1-acylglycerol-3-phosphate O-acyltransferase 4	ProteinCodingRNA	5.96993	6.42556	5.89331	7.15096	7.30263	7.43719	6.09626	7.29693	1.20066	6.7106e-07	0.000238132
ENSOCUT00000013998	ENSOCUG00000013994	PLA2G4D	phospholipase A2 group IVD	ProteinCodingRNA	6.56662	7.29391	7.04968	6.46686	8.4685	9.22021	6.97007	8.05186	1.08179	0.0169142	0.415681
ENSOCUT00000015531	ENSOCUG00000015539	---	---	ProteinCodingRNA	0	0	0	0	8.29805	0	0	2.76602	2.76602	8.86477e-09	5.42371e-06
ENSOCUT00000010838	ENSOCUG00000016317	CFAP44	cilia and flagella associated protein 44	ProteinCodingRNA	3.85986	3.99933	5.80906	5.07875	7.75197	7.39412	4.55608	6.74161	2.18553	0.00332383	0.183722
ENSOCUT00000033214	ENSOCUG00000029732	---	---	ProteinCodingRNA	2.13084	0.999643	1.08665	0.99552	4.18631	5.07152	1.40571	3.41778	2.01207	0.0129358	0.367821
ENSOCUT00000013565	ENSOCUG00000013571	LRRN3	leucine rich repeat neuronal 3	ProteinCodingRNA	7.32054	7.24722	6.75169	7.15096	9.52114	8.54359	7.10649	8.40523	1.29874	0.00341021	0.184474
ENSOCUT00000001628	ENSOCUG00000001627	SLC6A11	solute carrier family 6 member 11	ProteinCodingRNA	1.82162	3.32129	2.72661	0	7.37479	7.49541	2.62317	4.95673	2.33356	0.0190581	0.434797
ENSOCUT00000015099	ENSOCUG00000014083	LZTS1	leucine zipper tumor suppressor 1	ProteinCodingRNA	0.883565	0.999643	1.08665	7.03549	1.0087	1.01405	0.989953	3.01941	2.02946	0.00187432	0.131968
ENSOCUT00000028915	ENSOCUG00000024951	HOXB2	homeobox B2	ProteinCodingRNA	0	1.58449	0	3.31385	1.0087	3.61062	0.528162	2.64439	2.11623	0.0409143	0.589344
ENSOCUT00000011392	ENSOCUG00000011396	XIRP1	xin actin binding repeat containing 1	ProteinCodingRNA	4.35286	3.69978	2.45817	4.74625	5.97126	5.31265	3.5036	5.34339	1.83978	0.00436125	0.212948
ENSOCUT00000004498	ENSOCUG00000004494	THSD7B	thrombospondin type 1 domain containing 7B	ProteinCodingRNA	5.18931	7.35684	5.68849	4.57636	4.18631	2.83136	6.07821	3.86468	-2.21354	0.000990502	0.092013
ENSOCUT00000012147	ENSOCUG00000012586	---	---	ProteinCodingRNA	0	0	0	7.91588	0	7.69316	0	5.20301	5.20301	0.0131872	0.370809
ENSOCUT00000022169	ENSOCUG00000015634	TNNT2	troponin T2, cardiac type	ProteinCodingRNA	3.85986	4.85729	5.02088	5.60592	7.50106	6.47059	4.57934	6.52586	1.94651	0.00033409	0.0463961
ENSOCUT00000000726	ENSOCUG00000000725	MC5R	melanocortin 5 receptor	ProteinCodingRNA	7.78582	8.49913	8.444	5.66363	6.75865	7.1977	8.24299	6.53999	-1.703	0.000113849	0.0219568
ENSOCUT00000025882	ENSOCUG00000026569	---	---	ProteinCodingRNA	0	0	0	2.79967	3.60086	2.02102	0	2.80718	2.80718	0.00174746	0.129729
ENSOCUT00000026868	ENSOCUG00000024335	---	---	ProteinCodingRNA	2.78963	3.16929	3.6133	4.38377	5.1043	4.61177	3.19074	4.69995	1.50921	0.00203887	0.13813
ENSOCUT00000017241	ENSOCUG00000017243	FAR2	fatty acyl-CoA reductase 2	ProteinCodingRNA	9.4367	9.85416	8.87191	9.71214	11.2593	11.8628	9.38759	10.9448	1.55717	0.000393925	0.0502835
ENSOCUT00000033235	ENSOCUG00000029507	---	---	ProteinCodingRNA	0	1.58449	1.69938	2.79967	3.60086	3.34712	1.09462	3.24922	2.1546	0.0112171	0.346131
ENSOCUT00000013895	ENSOCUG00000013900	---	---	ProteinCodingRNA	2.13084	2.32136	3.6133	0	0	0	2.6885	0	-2.6885	0.00309166	0.173593
ENSOCUT00000008727	ENSOCUG00000008699	COL22A1	collagen type XXII alpha 1 chain	ProteinCodingRNA	4.67259	4.64317	3.32054	3.99159	7.79862	8.28526	4.2121	6.69182	2.47972	0.000314405	0.0455741
ENSOCUT00000011025	ENSOCUG00000011027	CHIT1	chitinase 1	ProteinCodingRNA	7.64067	7.93003	8.41579	7.69843	10.2365	9.25914	7.9955	9.06469	1.06919	0.0137245	0.374638
ENSOCUT00000003333	ENSOCUG00000003332	FAM186B	family with sequence similarity 186 member B	ProteinCodingRNA	1.42753	0	0	2.57749	2.33582	3.19481	0.475843	2.7027	2.22686	0.0278731	0.515779
ENSOCUT00000009679	ENSOCUG00000009679	THEM5	thioesterase superfamily member 5	ProteinCodingRNA	8.40142	8.83534	9.16526	8.353	11.28	11.0517	8.80067	10.2282	1.42757	0.0202979	0.446831
ENSOCUT00000010772	ENSOCUG00000010769	KCNH7	potassium voltage-gated channel subfamily H member 7	ProteinCodingRNA	1.82162	0	0	2.31475	3.71645	3.83334	0.607208	3.28818	2.68097	0.0105364	0.336358
ENSOCUT00000030878	ENSOCUG00000025842	---	---	ProteinCodingRNA	4.09201	3.90623	3.85655	4.99131	4.87473	5.3492	3.95159	5.07174	1.12015	0.00347666	0.185802
ENSOCUT00000029574	ENSOCUG00000027272	GPR3	G protein-coupled receptor 3	ProteinCodingRNA	2.38533	0	2.1281	2.31475	4.82408	4.88499	1.50448	4.00794	2.50346	0.0081452	0.300458
ENSOCUT00000009267	ENSOCUG00000009269	NLGN1	neuroligin 1	ProteinCodingRNA	5.86926	6.58426	7.44349	6.1409	5.40925	4.93393	6.63233	5.49469	-1.13764	0.0214364	0.45496
ENSOCUT00000033786	ENSOCUG00000000821	---	---	ProteinCodingRNA	5.78334	11.4324	11.6924	5.31318	5.33884	0	9.63602	3.55067	-6.08535	0.00121033	0.102751
ENSOCUT00000033782	ENSOCUG00000029280	---	---	ProteinCodingRNA	4.67259	2.32136	2.1281	0	0	0	3.04068	0	-3.04068	0.00107449	0.0939149
ENSOCUT00000033256	ENSOCUG00000016038	---	---	ProteinCodingRNA	5.43451	0	5.55692	0	0	2.34434	3.66381	0.781447	-2.88236	0.0216095	0.456359
ENSOCUT00000033334	ENSOCUG00000029379	H1FOO	H1 histone family member O oocyte specific	ProteinCodingRNA	0	0	0	0	3.33754	4.1138	0	2.48378	2.48378	0.0186365	0.431234
ENSOCUT00000000233	ENSOCUG00000000233	RTN1	reticulon 1	ProteinCodingRNA	4.29193	4.39164	4.24647	3.57674	1.0087	1.60366	4.31001	2.06303	-2.24698	0.0184019	0.430881
ENSOCUT00000009475	ENSOCUG00000009464	ADGRB3	adhesion G protein-coupled receptor B3	ProteinCodingRNA	4.16177	3.99933	5.29312	1.99327	2.82223	3.72627	4.48474	2.84726	-1.63748	0.0187489	0.431234
ENSOCUT00000008304	ENSOCUG00000008303	MMP12	macrophage metalloelastase precursor	ProteinCodingRNA	4.85213	5.88194	6.48833	5.66363	9.40102	6.79589	5.7408	7.28685	1.54605	0.00968322	0.327731
ENSOCUT00000027520	ENSOCUG00000027208	MYBPHL	myosin binding protein H like	ProteinCodingRNA	3.10507	3.80669	2.45817	3.79902	5.40925	5.67126	3.12331	4.95984	1.83653	0.00363705	0.190924
ENSOCUT00000001088	ENSOCUG00000001085	ALK	ALK receptor tyrosine kinase	ProteinCodingRNA	3.94146	1.58449	3.14838	4.23943	6.08317	6.0048	2.89144	5.44247	2.55102	0.00105234	0.0938273
ENSOCUT00000007970	ENSOCUG00000007965	---	---	ProteinCodingRNA	4.46749	3.90623	4.74671	5.03569	7.15677	7.01643	4.37348	6.40296	2.02949	0.000167236	0.0293789
ENSOCUT00000007215	ENSOCUG00000007214	TMEM116	transmembrane protein 116	ProteinCodingRNA	3.94146	5.16923	4.24647	4.63524	6.06147	6.21741	4.45239	5.63804	1.18565	0.0299208	0.525628
ENSOCUT00000014215	ENSOCUG00000014218	CACNG4	calcium voltage-gated channel auxiliary subunit gamma 4	ProteinCodingRNA	3.77336	4.08679	4.40793	4.57636	7.18714	5.64211	4.08936	5.80187	1.71251	0.00249582	0.158051
ENSOCUT00000005880	ENSOCUG00000005884	TBR1	T-box, brain 1	ProteinCodingRNA	2.38533	0	0	2.31475	5.40925	5.11461	0.795111	4.27954	3.48443	0.00274842	0.165336
ENSOCUT00000033270	ENSOCUG00000009639	WISP3	WNT1 inducible signaling pathway protein 3	ProteinCodingRNA	0.883565	3.16929	2.45817	3.45128	3.82346	4.98127	2.17034	4.08533	1.91499	0.0234879	0.473575
ENSOCUT00000033945	ENSOCUG00000002595	ANKRD33B	ankyrin repeat domain 33B	ProteinCodingRNA	4.85213	4.95351	6.04833	3.99159	3.82346	3.34712	5.28466	3.72072	-1.56393	0.00149604	0.117453
ENSOCUT00000012674	ENSOCUG00000012661	PTPRU	protein tyrosine phosphatase, receptor type U	ProteinCodingRNA	3.85986	3.99933	3.96434	5.69164	6.03944	5.93439	3.94118	5.88849	1.94731	9.49945e-09	5.61829e-06
ENSOCUT00000005561	ENSOCUG00000005563	LAMP3	lysosomal associated membrane protein 3	ProteinCodingRNA	3.94146	5.08677	6.2954	2.57749	3.71645	4.41896	5.10788	3.57097	-1.53691	0.0279357	0.515779
ENSOCUT00000015674	ENSOCUG00000015677	PLAC8L1	PLAC8 like 1	ProteinCodingRNA	1.82162	2.58437	2.95286	1.99327	5.4432	5.45358	2.45295	4.29669	1.84374	0.00818595	0.301335
ENSOCUT00000033489	ENSOCUG00000010525	UXT	ubiquitously expressed prefoldin like chaperone	ProteinCodingRNA	5.71536	6.91816	6.524	7.61312	8.60975	7.12579	6.38584	7.78289	1.39705	0.00239112	0.155976
ENSOCUT00000017414	ENSOCUG00000017415	FAM71A	family with sequence similarity 71 member A	ProteinCodingRNA	4.22832	4.58428	4.55312	3.79902	6.7451	7.84162	4.45524	6.12858	1.67334	0.00346318	0.185641
ENSOCUT00000028351	ENSOCUG00000024027	---	---	ProteinCodingRNA	1.82162	2.80674	3.32054	2.79967	4.47599	4.78182	2.64964	4.01916	1.36952	0.0453407	0.620478
ENSOCUT00000030775	ENSOCUG00000025378	---	---	ProteinCodingRNA	3.85986	3.58431	2.95286	0	0	0	3.46567	0	-3.46567	6.15662e-05	0.0138275
ENSOCUT00000033792	ENSOCUG00000029541	ZNF157	zinc finger protein 157	ProteinCodingRNA	6.37431	4.9062	4.48235	2.99215	4.54015	3.93301	5.25429	3.82177	-1.43252	0.0227989	0.465398
ENSOCUT00000015438	ENSOCUG00000015440	BCAR3	BCAR3, NSP family adaptor protein	ProteinCodingRNA	9.3497	9.14395	9.39934	9.3639	11.0895	10.4458	9.29766	10.2997	1.00206	0.00305426	0.172585
ENSOCUT00000027340	ENSOCUG00000024638	---	---	ProteinCodingRNA	2.95595	1.99947	2.45817	0	0	0	2.4712	0	-2.4712	0.00627436	0.263182
ENSOCUT00000027345	ENSOCUG00000009532	AFF3	AF4/FMR2 family member 3	ProteinCodingRNA	6.7248	6.30308	7.62692	7.51464	8.37043	8.70385	6.88493	8.19631	1.31138	0.00362007	0.190596
ENSOCUT00000025055	ENSOCUG00000021421	---	---	ProteinCodingRNA	0	0	0	1.99327	1.59655	2.02102	0	1.87028	1.87028	0.048795	0.637881
ENSOCUT00000033105	ENSOCUG00000029278	KRT78	keratin 78	ProteinCodingRNA	3.10507	3.58431	4.32946	4.84932	4.71712	5.78234	3.67294	5.11626	1.44331	0.00722999	0.283143
ENSOCUT00000011636	ENSOCUG00000011640	---	---	ProteinCodingRNA	2.38533	3.58431	3.74004	3.45128	5.50881	5.23667	3.23656	4.73225	1.49569	0.0191739	0.435599
ENSOCUT00000017550	ENSOCUG00000017551	XIRP2	xin actin binding repeat containing 2	ProteinCodingRNA	4.09201	5.69974	0	0	0	1.60366	3.26392	0.534555	-2.72936	0.0107805	0.33975
ENSOCUT00000024189	ENSOCUG00000011037	MYH7	myosin heavy chain 7	ProteinCodingRNA	5.22234	7.21846	2.72661	0	1.59655	2.6083	5.0558	1.40162	-3.65419	0.00021127	0.0347089
ENSOCUT00000008956	ENSOCUG00000008956	PCTP	phosphatidylcholine transfer protein	ProteinCodingRNA	9.88771	10.3008	9.60695	10.2602	11.2563	12.0964	9.93181	11.2043	1.27248	0.000850354	0.0840302
ENSOCUT00000003634	ENSOCUG00000003633	GFRA1	GDNF family receptor alpha 1	ProteinCodingRNA	8.95457	8.67171	8.98181	8.77895	7.31185	7.24694	8.86937	7.77925	-1.09012	0.0347464	0.559474
ENSOCUT00000027569	ENSOCUG00000005826	---	---	ProteinCodingRNA	6.54067	7.14904	7.01249	4.63524	6.03944	6.40267	6.90073	5.69245	-1.20828	0.0252098	0.488315
ENSOCUT00000004524	ENSOCUG00000004525	NDUFAF2	NADH:ubiquinone oxidoreductase complex assembly factor 2	ProteinCodingRNA	4.22832	3.99933	4.32946	4.63524	5.74493	5.80882	4.1857	5.39633	1.21063	0.00452079	0.215047
ENSOCUT00000027333	ENSOCUG00000006720	FGD2	FYVE, RhoGEF and PH domain containing 2	ProteinCodingRNA	0.883565	5.39162	0	0.99552	0	0	2.09173	0.33184	-1.75989	0.0258918	0.49611
ENSOCUT00000022783	ENSOCUG00000024988	---	---	ProteinCodingRNA	6.28334	6.79371	6.9218	5.92191	3.33754	5.3492	6.66628	4.86955	-1.79673	0.0144638	0.384755
ENSOCUT00000001235	ENSOCUG00000001236	SRD5A2	steroid 5 alpha-reductase 2	ProteinCodingRNA	5.91037	5.72722	4.68502	6.88592	6.24593	6.41995	5.44087	6.51727	1.07639	0.012049	0.3575
ENSOCUT00000025800	ENSOCUG00000012467	---	---	ProteinCodingRNA	4.0187	2.80674	3.85655	5.27666	5.33884	4.27443	3.56066	4.96331	1.40265	0.0100414	0.331161
ENSOCUT00000014599	ENSOCUG00000024499	---	---	ProteinCodingRNA	1.82162	2.80674	3.14838	2.79967	4.71712	4.27443	2.59225	3.9304	1.33815	0.0445263	0.617594
ENSOCUT00000033720	ENSOCUG00000029366	---	---	ProteinCodingRNA	2.6016	4.08679	3.85655	1.57899	1.59655	2.83136	3.51498	2.0023	-1.51268	0.0454614	0.620478
ENSOCUT00000030037	ENSOCUG00000022064	---	---	ProteinCodingRNA	0.883565	0	0	0	3.33754	3.34712	0.294522	2.22822	1.9337	0.048557	0.636297
ENSOCUT00000003445	ENSOCUG00000025147	---	---	ProteinCodingRNA	7.58462	8.7101	9.03841	8.01343	12.2929	11.6537	8.44437	10.6533	2.20895	0.00640536	0.263659
ENSOCUT00000006768	ENSOCUG00000006769	---	---	ProteinCodingRNA	5.1209	5.67173	4.97005	5.74608	6.509	7.42868	5.25423	6.56125	1.30703	0.00386759	0.198313
ENSOCUT00000025788	ENSOCUG00000026121	---	---	ProteinCodingRNA	4.0187	3.45878	1.69938	1.57899	2.01302	0	3.05895	1.19734	-1.86162	0.0428904	0.605337
ENSOCUT00000034024	ENSOCUG00000023708	---	---	ProteinCodingRNA	0	0	0	0	9.0753	8.31789	0	5.79773	5.79773	0.00653919	0.267339
ENSOCUT00000016853	ENSOCUG00000016858	NKAPL	NFKB activating protein like	ProteinCodingRNA	0	0	0	0	2.82223	4.34851	0	2.39025	2.39025	0.0213007	0.453941
ENSOCUT00000001593	ENSOCUG00000001594	SLC16A6	solute carrier family 16 member 6	ProteinCodingRNA	7.39486	8.54232	8.69934	7.97406	6.42653	7.16732	8.21217	7.1893	-1.02287	0.0402671	0.588032
ENSOCUT00000010331	ENSOCUG00000010336	NTS	neurotensin	ProteinCodingRNA	6.08214	5.35686	4.40793	4.45087	3.33754	3.34712	5.28231	3.71184	-1.57046	0.00698988	0.277453
ENSOCUT00000017456	ENSOCUG00000017453	---	---	ProteinCodingRNA	8.04315	7.79371	8.06859	7.36612	10.5938	10.2747	7.96848	9.41154	1.44306	0.00202592	0.13813
ENSOCUT00000025360	ENSOCUG00000022624	SLC26A9	solute carrier family 26 member 9	ProteinCodingRNA	5.28621	6.37433	7.42474	5.4175	3.60086	5.31265	6.36176	4.77701	-1.58475	0.0156566	0.399705
ENSOCUT00000016274	ENSOCUG00000016280	CXCL10	C-X-C motif chemokine ligand 10	ProteinCodingRNA	5.61944	6.78065	6.65847	5.99117	3.71645	5.0271	6.35286	4.91157	-1.44128	0.0422947	0.60131
ENSOCUT00000011882	ENSOCUG00000011887	FAM71C	family with sequence similarity 71 member C	ProteinCodingRNA	2.78963	3.80669	4.06464	4.7987	4.97098	4.93393	3.55365	4.9012	1.34755	0.00612621	0.260665
ENSOCUT00000033147	ENSOCUG00000029525	---	---	ProteinCodingRNA	6.2676	1.99947	2.45817	2.57749	2.33582	2.6083	3.57508	2.5072	-1.06788	0.036362	0.570443
ENSOCUT00000033148	ENSOCUG00000017837	SESTD1	SEC14 and spectrin domain containing 1	ProteinCodingRNA	9.90179	10.3458	5.71959	5.45066	5.84993	5.83482	8.65573	5.7118	-2.94392	0.000317171	0.0455741
ENSOCUT00000026885	ENSOCUG00000025494	SCG3	secretogranin III	ProteinCodingRNA	5.51668	6.02167	5.16341	4.69181	3.33754	3.93301	5.56725	3.98745	-1.5798	0.00181432	0.130243
ENSOCUT00000005067	ENSOCUG00000026015	---	---	ProteinCodingRNA	7.48607	7.65034	8.179	7.06791	10.2876	10.2103	7.7718	9.18862	1.41682	0.024928	0.484591
ENSOCUT00000026851	ENSOCUG00000025665	---	---	ProteinCodingRNA	0	0	0	1.99327	3.82346	2.34434	0	2.72036	2.72036	0.00276443	0.165336
ENSOCUT00000024371	ENSOCUG00000027367	---	---	ProteinCodingRNA	3.58305	3.90623	3.85655	3.45128	6.4434	5.69984	3.78194	5.19817	1.41623	0.010945	0.3425
ENSOCUT00000025428	ENSOCUG00000014197	MSR1	macrophage scavenger receptor types I and II	ProteinCodingRNA	5.88996	6.49115	6.75169	6.29492	8.28407	8.43302	6.3776	7.67067	1.29307	0.00565515	0.248523
ENSOCUT00000006746	ENSOCUG00000006745	SLC6A12	sodium- and chloride-dependent betaine transporter	ProteinCodingRNA	6.2676	7.62865	7.76002	6.1409	5.92394	6.58226	7.21876	6.2157	-1.00306	0.0121529	0.3586
ENSOCUT00000004295	ENSOCUG00000004298	NT5C1A	5-nucleotidase, cytosolic IA	ProteinCodingRNA	4.89373	5.28471	6.02363	3.16195	4.82408	4.19635	5.40069	4.06079	-1.3399	0.0240035	0.475315
ENSOCUT00000033881	ENSOCUG00000029696	---	---	ProteinCodingRNA	1.82162	0	2.72661	0	5.06121	5.91014	1.51608	3.65712	2.14104	0.0322555	0.544538
ENSOCUT00000001005	ENSOCUG00000001006	TACR1	tachykinin receptor 1	ProteinCodingRNA	6.2676	6.59921	7.21158	5.69164	6.10455	4.61177	6.6928	5.46932	-1.22348	0.0132339	0.37088
ENSOCUT00000017923	ENSOCUG00000017923	---	---	ProteinCodingRNA	2.38533	1.58449	1.69938	2.57749	3.01518	4.55032	1.88973	3.381	1.49127	0.0366914	0.572952
ENSOCUT00000011196	ENSOCUG00000011196	LAG3	lymphocyte activating 3	ProteinCodingRNA	5.82694	5.97658	5.68849	6.1409	7.19713	7.49541	5.83067	6.94448	1.11381	0.00224044	0.148329
ENSOCUT00000032029	ENSOCUG00000027187	---	---	ProteinCodingRNA	4.85213	5.32123	5.48634	5.48308	7.47667	7.31319	5.2199	6.75765	1.53775	0.00128973	0.106933
ENSOCUT00000017691	ENSOCUG00000017691	UNC5D	unc-5 netrin receptor D	ProteinCodingRNA	5.1209	5.78066	5.92033	3.16195	3.71645	3.93301	5.6073	3.6038	-2.00349	5.43736e-06	0.00166336
ENSOCUT00000012906	ENSOCUG00000012905	GABRA5	gamma-aminobutyric acid type A receptor alpha5 subunit	ProteinCodingRNA	0	0	0	2.99215	3.82346	2.02102	0	2.94555	2.94555	0.00106094	0.0939149
ENSOCUT00000003896	ENSOCUG00000003894	SV2A	synaptic vesicle glycoprotein 2A	ProteinCodingRNA	7.51967	7.24722	8.2067	6.89799	6.9714	6.07194	7.65786	6.64711	-1.01076	0.00600911	0.256915
ENSOCUT00000005003	ENSOCUG00000005003	---	---	ProteinCodingRNA	4.35286	5.24723	4.74671	4.57636	6.66102	7.12579	4.78227	6.12106	1.33879	0.0116364	0.351286
ENSOCUT00000012279	ENSOCUG00000012280	GPC5	glypican 5	ProteinCodingRNA	2.38533	1.99947	2.95286	0	0	0	2.44589	0	-2.44589	0.00693549	0.275911
ENSOCUT00000032152	ENSOCUG00000025220	---	---	ProteinCodingRNA	0	0	1.08665	0	5.82439	4.67071	0.362216	3.49837	3.13615	0.00176104	0.130192
ENSOCUT00000002879	ENSOCUG00000002879	DDX50	DExD-box helicase 50	ProteinCodingRNA	4.29193	5.69974	1.08665	1.57899	1.0087	1.01405	3.69277	1.20058	-2.4922	0.00202502	0.13813
ENSOCUT00000013019	ENSOCUG00000013003	SCN3A	sodium voltage-gated channel alpha subunit 3	ProteinCodingRNA	7.25821	7.95929	7.1444	6.56098	5.79839	6.23704	7.45397	6.1988	-1.25517	0.000188789	0.0319018
ENSOCUT00000028456	ENSOCUG00000025182	---	---	ProteinCodingRNA	1.82162	0	1.08665	0.99552	4.01626	3.48487	0.969424	2.83222	1.86279	0.0459871	0.623337
ENSOCUT00000007679	ENSOCUG00000007679	CHRNA2	cholinergic receptor nicotinic alpha 2 subunit	ProteinCodingRNA	2.95595	0	0	2.31475	4.97098	4.83433	0.985317	4.04002	3.0547	0.0298293	0.525628
ENSOCUT00000017183	ENSOCUG00000017185	---	---	ProteinCodingRNA	11.025	12.0444	12.269	9.22706	9.31881	9.70565	11.7794	9.41717	-2.36228	6.5477e-14	2.90439e-10
ENSOCUT00000000814	ENSOCUG00000000815	GPR75	G protein-coupled receptor 75	ProteinCodingRNA	4.52156	4.32125	4.06464	4.45087	5.74493	6.31301	4.30249	5.50294	1.20045	0.0120878	0.358052
ENSOCUT00000033511	ENSOCUG00000008901	NAGK	N-acetylglucosamine kinase	ProteinCodingRNA	5.86926	6.32122	6.47015	6.62047	7.78544	7.28517	6.22021	7.23036	1.01015	0.0038434	0.197662
ENSOCUT00000013778	ENSOCUG00000013774	CDH8	cadherin 8	ProteinCodingRNA	7.14219	7.55388	7.75252	6.67761	4.40884	6.55122	7.48286	5.87922	-1.60364	0.0163547	0.409128
ENSOCUT00000005353	ENSOCUG00000005353	ANKDD1A	ankyrin repeat and death domain containing 1A	ProteinCodingRNA	3.94146	4.64317	4.24647	5.38356	6.3209	5.88547	4.27703	5.86331	1.58627	9.76857e-05	0.0196959
ENSOCUT00000003560	ENSOCUG00000003550	---	---	ProteinCodingRNA	2.38533	0	0	2.57749	3.71645	3.48487	0.795111	3.2596	2.46449	0.0484737	0.636146
ENSOCUT00000017085	ENSOCUG00000009828	ARPP21	cAMP regulated phosphoprotein 21	ProteinCodingRNA	2.6016	6.30308	6.64233	3.99159	2.59943	4.27443	5.18234	3.62182	-1.56052	0.0207558	0.449337
ENSOCUT00000006703	ENSOCUG00000006703	LTB	lymphotoxin beta	ProteinCodingRNA	2.95595	3.80669	5.20796	2.99215	0	0	3.9902	0.997384	-2.99282	0.0353879	0.561616
ENSOCUT00000006257	ENSOCUG00000006239	CSMD3	CUB and Sushi multiple domains 3	ProteinCodingRNA	3.36376	4.52288	4.40793	0	2.01302	2.02102	4.09819	1.34468	-2.75351	0.000840218	0.0840302
ENSOCUT00000025680	ENSOCUG00000012420	IP6K2	Inositol hexakisphosphate kinase 2	ProteinCodingRNA	4.09201	4.99931	4.48235	5.20072	6.91201	6.65704	4.52455	6.25659	1.73204	0.000524266	0.0596286
ENSOCUT00000028447	ENSOCUG00000023661	---	---	ProteinCodingRNA	8.77143	5.16923	4.97005	5.45066	4.97098	5.45358	6.30357	5.29174	-1.01183	0.0250811	0.486354
ENSOCUT00000028977	ENSOCUG00000008902	GLOD5	glyoxalase domain containing 5	ProteinCodingRNA	4.09201	4.16925	2.72661	2.79967	2.01302	2.02102	3.66262	2.2779	-1.38472	0.0318314	0.542367
ENSOCUT00000016745	ENSOCUG00000016746	IL1R2	interleukin 1 receptor type 2	ProteinCodingRNA	10.3882	10.9528	11.1449	10.7576	13.651	12.645	10.8286	12.3512	1.52256	0.0133043	0.371072
ENSOCUT00000008859	ENSOCUG00000008859	KCNH5	potassium voltage-gated channel subfamily H member 5	ProteinCodingRNA	4.41131	3.80669	2.1281	1.99327	0	0	3.4487	0.664425	-2.78428	0.00980999	0.328167
ENSOCUT00000012867	ENSOCUG00000012871	CDNF	cerebral dopamine neurotrophic factor	ProteinCodingRNA	3.94146	3.69978	4.15842	2.57749	2.82223	2.02102	3.93322	2.47358	-1.45964	0.0114896	0.350878
ENSOCUT00000031380	ENSOCUG00000016424	AMPD1	adenosine monophosphate deaminase 1	ProteinCodingRNA	0	0	0	0	4.60158	2.34434	0	2.31531	2.31531	0.021749	0.456368
ENSOCUT00000014320	ENSOCUG00000014307	DUOX1	dual oxidase 1	ProteinCodingRNA	10.8069	10.4638	10.8076	10.0477	13.1413	12.4049	10.6928	11.8646	1.17184	0.0386134	0.582087
ENSOCUT00000010161	ENSOCUG00000010167	AVPR1A	arginine vasopressin receptor 1A	ProteinCodingRNA	7.64676	7.83849	7.55976	7.80485	10.8415	11.0145	7.68167	9.88695	2.20528	0.00107279	0.0939149
ENSOCUT00000010553	ENSOCUG00000010551	SLC7A3	solute carrier family 7 member 3	ProteinCodingRNA	7.06236	7.08675	7.68322	6.87375	6.03944	5.86037	7.27744	6.25785	-1.01959	0.00756752	0.287524
ENSOCUT00000001188	ENSOCUG00000001188	COL10A1	collagen type X alpha 1 chain	ProteinCodingRNA	13.0214	14.3704	14.4477	12.503	11.4091	12.3012	13.9465	12.0711	-1.87538	5.76143e-06	0.00173263
ENSOCUT00000008181	ENSOCUG00000008183	---	---	ProteinCodingRNA	4.46749	3.69978	3.74004	2.57749	2.33582	2.83136	3.96911	2.58155	-1.38755	0.013343	0.371072
ENSOCUT00000006270	ENSOCUG00000006268	SH3KBP1	SH3 domain containing kinase binding protein 1	ProteinCodingRNA	8.53558	8.51893	8.25527	7.07856	6.6896	6.17732	8.43659	6.64849	-1.7881	3.82851e-11	7.5477e-08
ENSOCUT00000007054	ENSOCUG00000007052	PENK	proenkephalin	ProteinCodingRNA	6.93864	7.27542	7.29653	7.37478	8.2509	9.61477	7.1702	8.41348	1.24329	0.00374968	0.194534
ENSOCUT00000023265	ENSOCUG00000021340	---	---	ProteinCodingRNA	1.82162	2.32136	1.69938	0	0	0	1.94745	0	-1.94745	0.0397686	0.586607
ENSOCUT00000004346	ENSOCUG00000004350	UBXN10	UBX domain protein 10	ProteinCodingRNA	0	0	0	2.31475	3.18535	2.83136	0	2.77715	2.77715	0.00159449	0.121841
ENSOCUT00000031537	ENSOCUG00000009184	CTHRC1	collagen triple helix repeat containing 1	ProteinCodingRNA	3.10507	3.69978	1.08665	0	6.47658	8.6536	2.6305	5.04339	2.41289	0.0289007	0.524856
ENSOCUT00000016764	ENSOCUG00000016758	---	---	ProteinCodingRNA	0	0	0	0	2.33582	4.19635	0	2.17739	2.17739	0.0339324	0.553367
ENSOCUT00000021581	ENSOCUG00000009918	SCARA3	scavenger receptor class A member 3	ProteinCodingRNA	6.11768	4.45875	5.83769	5.66363	10.7469	5.88547	5.47137	7.43201	1.96064	0.0136052	0.37368
ENSOCUT00000001894	ENSOCUG00000001891	GPAT2	glycerol-3-phosphate acyltransferase 2, mitochondrial	ProteinCodingRNA	4.0187	2.58437	3.74004	3.79902	5.4432	5.19712	3.4477	4.81311	1.36541	0.0278595	0.515779
ENSOCUT00000009620	ENSOCUG00000009616	CRISPLD1	cysteine rich secretory protein LCCL domain containing 1	ProteinCodingRNA	10.6189	11.948	12.5991	10.1009	10.4021	11.5318	11.722	10.6783	-1.04375	0.0324568	0.544707
ENSOCUT00000022548	ENSOCUG00000025290	CHGA	chromogranin A	ProteinCodingRNA	4.22832	4.45875	4.32946	4.74625	6.46008	6.53545	4.33884	5.91393	1.57509	0.00102017	0.0931868
ENSOCUT00000001309	ENSOCUG00000001309	ISM1	isthmin 1	ProteinCodingRNA	10.005	10.3369	10.3205	10.3118	11.9223	11.4511	10.2208	11.2284	1.00759	0.00214448	0.144127
ENSOCUT00000000029	ENSOCUG00000000028	ZNF503	zinc finger protein 503	ProteinCodingRNA	3.77336	2.80674	5.37354	5.77255	5.06121	6.41995	3.98455	5.75124	1.76669	0.0366708	0.572952
ENSOCUT00000013610	ENSOCUG00000013609	LBP	lipopolysaccharide binding protein	ProteinCodingRNA	8.41933	7.31217	7.75252	4.84932	5.57156	6.48708	7.82801	5.63599	-2.19202	1.32976e-05	0.0034697
ENSOCUT00000005160	ENSOCUG00000005162	CES4A	carboxylesterase 4A	ProteinCodingRNA	8.35004	8.94473	8.0069	9.13825	10.6023	11.2429	8.43389	10.3278	1.89391	2.28667e-05	0.00579606
ENSOCUT00000013055	ENSOCUG00000013056	ZNF804B	zinc finger protein 804B	ProteinCodingRNA	4.97349	4.85729	4.91738	4.23943	3.01518	2.02102	4.91605	3.09188	-1.82418	0.011108	0.345166
ENSOCUT00000017619	ENSOCUG00000017618	SLC5A12	solute carrier family 5 member 12	ProteinCodingRNA	4.22832	2.58437	3.47433	1.99327	0	2.34434	3.42901	1.44587	-1.98314	0.0346093	0.559264
ENSOCUT00000033640	ENSOCUG00000029253	---	---	ProteinCodingRNA	6.23561	8.36998	8.2711	6.79846	6.40945	6.58226	7.62556	6.59672	-1.02884	0.0145932	0.387037
ENSOCUT00000031511	ENSOCUG00000023599	APOD	apolipoprotein D precursor	ProteinCodingRNA	12.4673	14.1042	14.2722	13.7851	15.3907	15.9682	13.6146	15.048	1.43343	0.013053	0.369376
ENSOCUT00000012011	ENSOCUG00000012017	CHSY1	chondroitin sulfate synthase 1	ProteinCodingRNA	5.28621	5.20876	6.81065	4.57636	3.01518	4.78182	5.76854	4.12446	-1.64408	0.0119222	0.356122
ENSOCUT00000003012	ENSOCUG00000002999	---	---	ProteinCodingRNA	7.44469	4.7542	3.6133	4.51498	4.01626	3.93301	5.27073	4.15475	-1.11598	0.0298078	0.525628
ENSOCUT00000008797	ENSOCUG00000008803	SPINK14	serine peptidase inhibitor, Kazal type 14 (putative)	ProteinCodingRNA	0	1.58449	2.1281	2.31475	3.4752	4.34851	1.23753	3.37949	2.14196	0.0197774	0.441953
ENSOCUT00000017658	ENSOCUG00000017658	---	---	ProteinCodingRNA	3.24021	1.99947	3.74004	3.99159	4.77159	4.55032	2.99324	4.43783	1.44459	0.0240296	0.475315
ENSOCUT00000013266	ENSOCUG00000013264	---	---	ProteinCodingRNA	5.25463	4.85729	4.80587	5.03569	6.47658	7.10457	4.9726	6.20561	1.23302	0.0085115	0.310102
ENSOCUT00000005444	ENSOCUG00000005443	SLC10A2	Ileal sodium/bile acid cotransporter	ProteinCodingRNA	0	0	0	2.57749	3.01518	2.6083	0	2.73366	2.73366	0.00178654	0.130243
ENSOCUT00000013325	ENSOCUG00000013331	---	---	ProteinCodingRNA	7.88197	8.36998	8.82621	7.80485	4.97098	5.11461	8.35938	5.96348	-2.39591	0.0130467	0.369376
ENSOCUT00000028146	ENSOCUG00000006338	---	---	ProteinCodingRNA	4.71961	5.39162	5.55692	6.09968	6.52494	6.65704	5.22272	6.42722	1.2045	0.000461577	0.0545984
ENSOCUT00000016049	ENSOCUG00000016053	RAB44	RAB44, member RAS oncogene family	ProteinCodingRNA	2.95595	4.24725	4.97005	4.07902	6.20693	6.78259	4.05775	5.68951	1.63176	0.020229	0.446579
ENSOCUT00000022686	ENSOCUG00000002151	SDR39U1	short chain dehydrogenase/reductase family 39U member 1	ProteinCodingRNA	5.9305	5.49116	5.6567	5.66363	7.83104	7.84802	5.69279	7.11423	1.42144	0.0025031	0.158051
ENSOCUT00000023226	ENSOCUG00000023240	---	---	ProteinCodingRNA	3.94146	2.32136	2.45817	4.23943	5.1043	4.72734	2.907	4.69035	1.78336	0.0103647	0.334049
ENSOCUT00000009328	ENSOCUG00000009328	CRLS1	cardiolipin synthase 1	ProteinCodingRNA	0	0	0	0	8.81172	0	0	2.93724	2.93724	4.13942e-09	3.06024e-06
ENSOCUT00000033663	ENSOCUG00000001813	ARG1	arginase-1	ProteinCodingRNA	3.85986	0.999643	3.47433	4.16145	4.82408	4.83433	2.77794	4.60662	1.82867	0.049427	0.640865
ENSOCUT00000013387	ENSOCUG00000013389	EPYC	epiphycan	ProteinCodingRNA	7.6098	8.95348	9.81204	7.00232	6.35698	8.45415	8.79178	7.27115	-1.52063	0.0207663	0.449337
ENSOCUT00000003077	ENSOCUG00000003078	APLNR	apelin receptor	ProteinCodingRNA	8.08864	8.03821	7.72979	7.64928	5.47638	7.01643	7.95221	6.71403	-1.23818	0.0457913	0.621158
ENSOCUT00000013804	ENSOCUG00000013809	B3GNT6	UDP-GlcNAc:betaGal beta-1,3-N-acetylglucosaminyltransferase 6	ProteinCodingRNA	3.10507	0	2.1281	1.99327	4.01626	5.98171	1.74439	3.99708	2.25269	0.0310077	0.534726
ENSOCUT00000029644	ENSOCUG00000027529	ELOVL7	ELOVL fatty acid elongase 7	ProteinCodingRNA	12.0229	11.9833	11.2545	12.1796	12.9826	13.5571	11.7536	12.9064	1.15289	0.000939405	0.0895175
ENSOCUT00000030813	ENSOCUG00000021276	---	---	ProteinCodingRNA	1.42753	2.99938	0	2.99215	4.97098	4.41896	1.47564	4.12736	2.65173	0.0117027	0.351286
ENSOCUT00000015713	ENSOCUG00000015704	GPR179	G protein-coupled receptor 179	ProteinCodingRNA	5.76103	5.12859	5.16341	5.94537	6.78537	6.47059	5.35101	6.40044	1.04943	0.00340768	0.184474
ENSOCUT00000022895	ENSOCUG00000009101	CCDC129	coiled-coil domain containing 129	ProteinCodingRNA	0	0	0	0.99552	4.18631	3.72627	0	2.96937	2.96937	0.00164678	0.123808
ENSOCUT00000011874	ENSOCUG00000011876	SLN	Sarcolipin	ProteinCodingRNA	4.46749	3.58431	3.96434	5.20072	5.47638	5.58196	4.00538	5.41969	1.41431	0.000537826	0.0603965
ENSOCUT00000003440	ENSOCUG00000022445	---	---	ProteinCodingRNA	5.48981	7.81307	3.47433	4.16145	2.82223	0	5.5924	2.32789	-3.26451	0.00522992	0.236118
ENSOCUT00000007566	ENSOCUG00000004074	ACTC1	actin, alpha, cardiac muscle 1	ProteinCodingRNA	3.10507	3.58431	5.75003	1.57899	3.01518	2.6083	4.14647	2.40082	-1.74565	0.0169149	0.415681
ENSOCUT00000022401	ENSOCUG00000004211	TMEM102	transmembrane protein 102	ProteinCodingRNA	5.40604	4.39164	5.9729	0	0	1.01405	5.25686	0.338016	-4.91884	3.25016e-07	0.000129931
ENSOCUT00000033950	ENSOCUG00000029645	---	---	ProteinCodingRNA	5.22234	5.95349	4.74671	5.4175	6.89984	6.93462	5.30752	6.41732	1.1098	0.0262386	0.496886
ENSOCUT00000010601	ENSOCUG00000010602	GDF5	growth differentiation factor 5	ProteinCodingRNA	3.10507	5.67173	6.64233	2.99215	3.82346	3.61062	5.13971	3.47541	-1.6643	0.0075521	0.287524
ENSOCUT00000033979	ENSOCUG00000003117	USP50	ubiquitin specific peptidase 50	ProteinCodingRNA	3.36376	3.32129	2.72661	3.99159	4.92366	3.83334	3.13722	4.24953	1.11231	0.0383285	0.581628
ENSOCUT00000017210	ENSOCUG00000017216	LRRC10	leucine rich repeat containing 10	ProteinCodingRNA	2.13084	1.99947	2.45817	2.79967	3.18535	5.27516	2.19616	3.75339	1.55723	0.01893	0.433388
ENSOCUT00000016295	ENSOCUG00000016284	C9orf84	chromosome 9 open reading frame 84	ProteinCodingRNA	2.95595	1.99947	2.1281	2.57749	4.40884	4.93393	2.36117	3.97342	1.61225	0.0186872	0.431234
ENSOCUT00000029037	ENSOCUG00000027395	AIPL1	aryl hydrocarbon receptor interacting protein like 1	ProteinCodingRNA	0.883565	1.99947	2.1281	1.99327	3.33754	4.34851	1.67038	3.22644	1.55607	0.0405377	0.588773
ENSOCUT00000033577	ENSOCUG00000013603	ALAS2	5-aminolevulinate synthase 2	ProteinCodingRNA	4.67259	5.75419	6.524	4.57636	1.59655	1.01405	5.65026	2.39565	-3.25461	0.0102534	0.334049
ENSOCUT00000033167	ENSOCUG00000009566	S100A8	S100 calcium binding protein A8	ProteinCodingRNA	6.02712	7.40868	10.1682	6.77247	6.49288	6.33139	7.86801	6.53225	-1.33577	0.0330068	0.54938
ENSOCUT00000004421	ENSOCUG00000004422	BTG2	BTG anti-proliferation factor 2	ProteinCodingRNA	9.55648	10.7187	11.0767	10.8389	12.2929	12.059	10.4506	11.7302	1.27962	0.00556837	0.246383
ENSOCUT00000007573	ENSOCUG00000007576	FGF16	fibroblast growth factor 16	ProteinCodingRNA	2.78963	2.58437	2.95286	0	0	0	2.77562	0	-2.77562	0.00154741	0.119894
ENSOCUT00000015772	ENSOCUG00000015782	ACTL7B	actin like 7B	ProteinCodingRNA	2.38533	2.58437	3.14838	3.69216	4.71712	3.83334	2.70603	4.08087	1.37484	0.0162506	0.407251
ENSOCUT00000004024	ENSOCUG00000004024	HSD11B1	hydroxysteroid 11-beta dehydrogenase 1	ProteinCodingRNA	7.3876	7.91815	8.22307	7.61312	9.65394	9.57096	7.84294	8.94601	1.10307	0.00946871	0.325374
ENSOCUT00000033305	ENSOCUG00000005839	ILDR2	immunoglobulin like domain containing receptor 2	ProteinCodingRNA	4.67259	4.39164	5.29312	4.69181	6.87517	5.88547	4.78578	5.81748	1.0317	0.0400089	0.586677
ENSOCUT00000003428	ENSOCUG00000003426	WSCD1	WSC domain containing 1	ProteinCodingRNA	7.15935	7.07611	7.70669	6.05725	5.79839	5.55092	7.31405	5.80219	-1.51186	1.57022e-07	6.79524e-05
ENSOCUT00000000774	ENSOCUG00000000774	PCDH9	protocadherin 9	ProteinCodingRNA	5.34737	5.83219	5.86577	3.31385	4.60158	4.61177	5.68178	4.17574	-1.50604	0.00164416	0.123808
ENSOCUT00000023773	ENSOCUG00000006861	PPP2R2B	serine/threonine-protein phosphatase 2A 55 kDa regulatory subunit B beta isoform	ProteinCodingRNA	5.08543	5.20876	5.41213	4.16145	1.0087	3.93301	5.23544	3.03438	-2.20106	0.0184256	0.430881
ENSOCUT00000021069	ENSOCUG00000003249	FZD1	frizzled class receptor 1	ProteinCodingRNA	0	0	0	10.7944	0	0	0	3.59812	3.59812	1.88936e-10	2.09518e-07
ENSOCUT00000017848	ENSOCUG00000017851	---	---	ProteinCodingRNA	6.51424	8.07075	8.0069	6.67761	6.20693	6.40267	7.53063	6.42907	-1.10156	0.00481702	0.225466
ENSOCUT00000002455	ENSOCUG00000002458	---	---	ProteinCodingRNA	8.47521	8.36998	7.68322	7.171	5.99435	6.83507	8.17613	6.6668	-1.50933	6.87237e-05	0.0150539
ENSOCUT00000004673	ENSOCUG00000025117	---	---	ProteinCodingRNA	4.71961	4.99931	4.74671	5.38356	7.10468	5.07152	4.82188	5.85325	1.03137	0.0286576	0.52339
ENSOCUT00000017274	ENSOCUG00000017275	TMCO2	transmembrane and coiled-coil domains 2	ProteinCodingRNA	0	0	1.08665	1.99327	3.4752	3.34712	0.362216	2.93853	2.57632	0.00435243	0.212948
